# Supplementary material for: Aneurysmal subarachnoid haemorrhage—cerebral vasospasm and prophylactic ibuprofen: a randomised controlled pilot trial protocol
Source: PubMed Central journal article supplement — BMJ Open. 2022 Apr 11;12(4):e058895. doi: 10.1136/bmjopen-2021-058895 (PMC9006795; doi:10.1136/bmjopen-2021-058895), 2022-04-11
Supplement: bmjopen-2021-058895.draft_revisions.pdf [file bmjopen-2021-058895.draft_revisions.pdf]

# BMJ Open

BMJ Open is committed to open peer review. As part of this commitment we make the peer review history of every article we publish publicly available.

When an article is published we post the peer reviewers' comments and the authors' responses online. We also post the versions of the paper that were used during peer review. These are the versions that the peer review comments apply to.

The versions of the paper that follow are the versions that were submitted during the peer review process. They are not the versions of record or the final published versions. They should not be cited or distributed as the published version of this manuscript.

BMJ Open is an open access journal and the full, final, typeset and author-corrected version of record of the manuscript is available on our site with no access controls, subscription charges or pay-per-view fees (<http://bmjopen.bmj.com>).

If you have any questions on BMJ Open's open peer review process please email [info.bmjopen@bmj.com](mailto:info.bmjopen@bmj.com)

# BMJ Open

## Prophylactic effects of Ibuprofen on cerebral vasospasm following aneurysmal subarachnoid hemorrhage: Protocol for a randomized placebo-controlled pilot trial

|                               |                                                                                                                                                                                                                                                                                                                                                                                                                                                                                                                                                                                                                                                                                                         |
|-------------------------------|---------------------------------------------------------------------------------------------------------------------------------------------------------------------------------------------------------------------------------------------------------------------------------------------------------------------------------------------------------------------------------------------------------------------------------------------------------------------------------------------------------------------------------------------------------------------------------------------------------------------------------------------------------------------------------------------------------|
| Journal:                      | <i>BMJ Open</i>                                                                                                                                                                                                                                                                                                                                                                                                                                                                                                                                                                                                                                                                                         |
| Manuscript ID                 | bmjopen-2021-058895                                                                                                                                                                                                                                                                                                                                                                                                                                                                                                                                                                                                                                                                                     |
| Article Type:                 | Protocol                                                                                                                                                                                                                                                                                                                                                                                                                                                                                                                                                                                                                                                                                                |
| Date Submitted by the Author: | 01-Nov-2021                                                                                                                                                                                                                                                                                                                                                                                                                                                                                                                                                                                                                                                                                             |
| Complete List of Authors:     | Dayyani, Mojtaba; City of Hope National Medical Center, Neurosurgery<br>Mousavi Mohammadi , Ermia ; Mashhad University of Medical Sciences<br>Ghaem Hospital, Neurosurgery<br>Ashoorion, Vahid; McMaster University Department of Health Research<br>Methods Evidence and Impact<br>Sadeghirad, Behnam; McMaster University Department of Health<br>Research Methods Evidence and Impact<br>Javedani Yekta , Mohammadreza ; Mashhad University of Medical<br>Sciences Ghaem Hospital<br>Grotta, James; Memorial Hermann Texas Medical Center<br>Gonzalez, Nestor; Cedars-Sinai Medical Center, Neurosurgery<br>Zabihyan, Samira; Mashhad University of Medical Sciences Ghaem<br>Hospital, Neurosurgery |
| Keywords:                     | Stroke < NEUROLOGY, NEUROSURGERY, Clinical trials < THERAPEUTICS                                                                                                                                                                                                                                                                                                                                                                                                                                                                                                                                                                                                                                        |
|                               |                                                                                                                                                                                                                                                                                                                                                                                                                                                                                                                                                                                                                                                                                                         |

SCHOLARONE™  
Manuscripts

1  
2  
3 1 **Prophylactic effects of Ibuprofen on cerebral vasospasm following aneurysmal**  
4  
5 2 **subarachnoid hemorrhage: Protocol for a randomised placebo-controlled pilot trial**  
6  
7  
8  
9 3

10  
11 4 Mojtaba Dayyani (MD)<sup>1,2</sup>, Ermia Mousavi Mohammadi (MD)<sup>2</sup>, Vahid Ashoorion (MD, PhD)<sup>3</sup>,  
12  
13 5 Behnam Sadeghirad (PharmD, MPH, PhD)<sup>3</sup>, Mohammadreza javedani yekta (MD)<sup>2</sup>, James  
14  
15 6 Grotta (MD)<sup>4</sup>, Nestor Gonzalez (MD)<sup>5</sup>, Samira Zabihyan (MD)<sup>2,\*</sup>  
16  
17

18 7 1. Division of Neurosurgery, City of Hope Beckman Research Institute and Medical Center,  
19 8 Duarte, California, United States

20 9 2. Department of Neurosurgery, Ghaem Teaching Hospital, Faculty of medicine, Mashhad  
21 10 University of Medical Sciences, Mashhad, Iran.

22 11 3. Department of Health Research Methods, Evidence, and Impact, McMaster University,  
23 12 Hamilton, Ontario, Canada.

24 13 4. Stroke Research and Mobile Stroke Unit, Memorial Hermann Hospital-Texas Medical Center,  
25 14 Houston, Texas, United States.

26 15 5. Department of Neurosurgery, Cedars Sinai Medical Center, Los Angeles, California.

27  
28  
29 16 **\*Corresponding author: Dr. Samira Zabihyan**

30  
31  
32 17 Email: zabihyan@yahoo.com/ zabihyans@mums.ac.ir

33 18 Tel: +989151115783

34 19 Fax: +985138411797

35 20 Postal Address: Department of Neurosurgery, Ghaem Teaching hospital, Parastar street, Ahmad  
36 21 Abad Blvd, Mashhad, Razavi-khorasan province, Iran.

37 22 Zip/postal code: 9176691999  
38  
39  
40 23

41 24 **Running head:** Prophylactic effects of Ibuprofen on cerebral vasospasm after aSAH

42  
43 25 **Text word count: 3191**

44  
45 26 **Abstract word count: 264**

46  
47 27 Number of figures: 3

48  
49 28 Number of tables: 0

50  
51 29 Appendix: 8 pages

52  
53 30 **Trial registration:** ISRCTN14611625  
54  
55  
56  
57  
58  
59  
60

1  
2  
3 **31 List of Abbreviations**  
4  
5

6 **32 Abbreviation** **Explanation**

|              |                                                                  |
|--------------|------------------------------------------------------------------|
| 8 33 aSAH    | aneurysmal Subarachnoid Hemorrhage                               |
| 9 34 CI      | Confidence Interval                                              |
| 10 35 COX    | Cyclooxygenase                                                   |
| 11 36 CSF    | Cerebrospinal Fluid                                              |
| 12 37 CTA    | CT Angiography                                                   |
| 13 38 CVS    | Cerebral Vasospasm                                               |
| 14 39 DSA    | Digital Subtraction Angiography                                  |
| 15 40 ICAM-1 | Intercellular adhesion molecule-1                                |
| 16 41 ICU    | Intensive care unit                                              |
| 17 42 TCD    | Transcranial Doppler                                             |
| 18 43 MRA    | Magnetic Resonance Imaging                                       |
| 19 44 mRS    | modified Rankin Scale                                            |
| 20 45 NIHSS  | National Institutes of Health Stroke Scale                       |
| 21 46 NSAIDs | Non-steroidal anti-inflammatory drugs                            |
| 22 47 PSVMCA | Peak Systolic Middle Cerebral Artery Velocity                    |
| 23 48 SIRS   | Systemic Inflammatory Response Syndrome                          |
| 24 49 SPIRIT | Standard Protocol Items Recommendation for Interventional Trials |
| 25 50 TXA    | Thromboxane                                                      |
| 26 51 VCAM-1 | Vascular Cell Adhesion Molecule-1                                |
| 27 52 WFNS   | World Federation of Neurological Surgeons                        |

28  
29  
30  
31  
32  
33  
34  
35  
36  
37  
38  
39  
40  
41  
42  
43  
44  
45  
46  
47  
48  
49  
50  
51  
52  
53  
54  
55  
56

1  
2  
3 **57 Abstract**  
4

5 **58 Introduction:** Cerebral vasospasm (CVS) is the leading cause of mortality and morbidity  
6  
7  
8 **59** following aSAH. One of the recently implicated underlying mechanisms of CVS is  
9  
10 **60** inflammatory cascades. Specific feasibility objectives include determining the ability to recruit  
11  
12 **61** 30 participants over twelve months while at least 75% of them comply with at least 75% of the  
13  
14 **62** study protocol and being able to follow 85% of them for three months after discharge.

15  
16  
17 **63 Methods and analysis:** This is a feasibility study for a randomised, controlled trial. Eligible  
18  
19 **64** participants are adult patients 18y/o and older with an aSAH confirmed by a brain CT scan, CT  
20  
21 **65** angiography, magnetic resonance angiography, or digital subtraction angiography who admitted  
22  
23 **66** to the emergency department within 12 hours of the ictus. Eligible subjects will be randomised 1:1  
24  
25 **67** for the administration of either ibuprofen or a placebo, while both groups will concomitantly be  
26  
27 **68** treated by the standard of care for two weeks. Care givers, patients, outcome assessors and data  
28  
29 **69** analysts will be blinded. This will be the first study to investigate the preventive effects of a short  
30  
31 **70** acting NSAID on CVS and the key expected outcome of this pilot study is the feasibility and safety  
32  
33 **71** assessment of the administration of Ibuprofen in patients with aSAH. The objectives of the  
34  
35 **72** definitive trial would be to assess the effect of Ibuprofen relative to placebo on mortality, CVS,  
36  
37 **73** DCI, and level of disability at 3-month follow-up.

38  
39  
40 **74 Ethics and dissemination:** This study is approved by Mashhad University of Medical Sciences  
41  
42 **75** ethical committee (IR.MUMS.MEDICAL.REC.1398.225). Results from the study will be  
43  
44 **76** submitted for publication regardless of whether or not there are significant findings.

45  
46  
47 **77 Trial registration:** ISRCTN14611625  
48

49  
50  
51 **78** Keywords: Aneurysmal subarachnoid hemorrhage, Cerebral vasospasm, Delayed cerebral  
52  
53 **79** ischemia, Feasibility study, Ibuprofen, Randomised Controlled Trial.  
54  
55  
56  
57  
58  
59  
60

## 80 **Strengths and limitations of this study**

- 81 • This is the first pilot trial in which the preventive role of a short-acting oral NSAID  
82 (Ibuprofen) is being assessed on cerebral vasospasm in a narrow time window (12-hour)  
83 after the occurrence of aneurysmal Subarachnoid Hemorrhage (aSAH).
- 84 • The objectives of this pilot study are the feasibility and safety assessment of the  
85 administration of Ibuprofen in patients with aSAH.
- 86 • The objectives of the definitive trial are to demonstrate the effects of Ibuprofen versus  
87 placebo on mortality, cerebral vasospasm, DCI, and level of disability at 3-month follow-  
88 up.
- 89 • During the pilot trial, we will collect information on all outcomes for the definitive trial.
- 90 • To minimize any potential bias, blinding of health care providers (physicians, ICU  
91 nurses, residents), patients, outcome assessors, and data analysts to treatment allocation is  
92 being undertaken.

93  
94  
95  
96  
97  
98  
99  
100

## 101 INTRODUCTION

### 102 *Background and Rationale*

103 Aneurysmal subarachnoid hemorrhage (aSAH) accounts for 5–10 % of all strokes worldwide,  
104 which approximately equals to a total of 600,000 new cases per year <sup>1</sup>. Up to 44% of such cases  
105 will die <sup>2</sup>, and almost 20% of the survived ones would become disabled and dependent <sup>2</sup>.  
106 Cerebral vasospasm following aSAH is the leading cause of mortality and morbidity <sup>3-5</sup>.  
107 The exact mechanisms of the complex inflammatory cascade leading to cerebral vasospasm is  
108 not well understood, and usual treatments have no sufficient therapeutic effects <sup>6-9</sup>. However,  
109 several studies support the hypothesis that local and systemic inflammatory responses may  
110 participate in the process of cerebral vasospasm and its consequent poor outcomes. Increased  
111 plasma and cerebrospinal fluid (CSF) level of inflammatory markers, like TNF- $\alpha$ , and various  
112 interleukins during SAH is seen, and this increment is correlated with poor neurological outcome  
113 <sup>10-12</sup>. Moreover, the systemic inflammatory response syndrome (SIRS) is associated with poor  
114 outcomes after SAH and is presented in up to 63 % of patients after SAH <sup>13 14</sup>. This becomes an  
115 impetus to evaluate the possible effectiveness of anti-inflammatory medications after SAH.  
116 Ibuprofen is one of the NSAIDs which inhibit COX enzymes in a non-specific manner. In  
117 addition to decreasing the level of cytokines and prostaglandins, this drug also prevents the  
118 expression of two specific cell adhesion molecules, intercellular adhesion molecule-1 (ICAM-1)  
119 and vascular cell adhesion molecule-1 (VCAM-1) that belongs to the immunoglobulin  
120 superfamily. The immunoglobulin superfamily proteins are up-regulated in patients who develop  
121 clinical vasospasm <sup>11</sup>. Leukocyte integrins bind to these proteins on endothelial cells. The  
122 immunoglobulin superfamily proteins are necessary for leukocyte-endothelial cell adhesion and  
123 leukocyte migration <sup>15-17</sup> (Figure 1).

1  
2  
3 124 Ibuprofen prevents inflammatory reactions caused by leukocytes with disrupting the process of  
4  
5 125 migration.  
6  
7  
8 126 Ibuprofen's efficacy on cerebral vasospasm has been proven in an intracranial model of rabbits  
9  
10 127 when its intracranial administration initiated within 6 hours after SAH, but no effect was  
11  
12 128 observed when treatment is begun later than 12 hours<sup>18</sup>. As the acute phase of inflammation  
13  
14 129 starts 3-4 hours after the SAH<sup>11</sup>, and ibuprofen is a fast acting NSAID; it could prevent from  
15  
16 130 binding of macrophages and neutrophils to the endothelial cells and entering the subarachnoid  
17  
18 131 space; hence, reducing the intensity of acute phase inflammation. This inhibitory action, will  
19  
20 132 decrease the number of trapped leukocytes dying and degranulating in the subarachnoid space in  
21  
22 133 the next 2 to 4 days<sup>11</sup>, and subsequently may reduce or prevent chronic vasospasm in the  
23  
24 134 upcoming days of admission. Thus, the early administration of ibuprofen considered in this study  
25  
26 135 might be a key to shut off the inflammatory cascade at the initial step (Figure 1). Furthermore, in  
27  
28 136 terms of side effects, the potential of NSAIDs to induce hemorrhagic stroke has been heavily  
29  
30 137 dismissed by self-reports, prescriptions databases, and large multicentered studies<sup>19</sup>.  
31  
32  
33  
34  
35  
36 138 To date, we have found four clinical trials evaluating the efficacy of NSAIDs on vasospasm after  
37  
38 139 aSAH, three of which were focused on the anti-platelet mechanism of aspirin <sup>20-22</sup>. The fourth  
39  
40 140 study was a placebo-controlled trial that assessed the preventive effects of meloxicam during  
41  
42 141 seven days after aSAH <sup>23</sup>. However, no clinical data are available regarding the efficacy of a fast  
43  
44 142 acting oral NSAID for the administration in a narrow time interval after the occurrence of aSAH.  
45  
46 143 In the current study, we sought to investigate the preventive role of ibuprofen on the vasospasm  
47  
48 144 secondary to aSAH and its outcomes.  
49  
50  
51  
52  
53  
54  
55  
56  
57  
58  
59  
60



1  
2  
3 145 **Objectives**  
4

5 146 The objective of the current pilot trial is to establish the feasibility of a larger trial by  
6  
7 147 successfully recruiting 30 participants over a 12-month period and demonstrating adherence to  
8  
9  
10 148 our study protocol. Additionally, we will identify possible adverse events related to the  
11  
12 149 administration of ibuprofen and determine whether its administration is superior to the standard  
13  
14 150 treatment in terms of the prevention of cerebral vasospasm secondary to aSAH and its clinical  
15  
16 151 outcomes.  
17

18  
19 152 **Trial design**  
20

21 153 This pilot trial is a single center, parallel randomized 1:1, controlled, clinical trial. Health care  
22  
23 154 providers (physicians, ICU nurses, residents), patients, outcome assessors, and data analysts will  
24  
25 155 be blinded to treatment allocation. We followed standard protocol items recommendation for  
26  
27 156 interventional trials (SPIRIT) checklist to conduct this pilot clinical trial protocol<sup>24</sup>.  
28  
29  
30

31 157  
32

33 158  
34

35 159  
36

37 160  
38

39 161  
40

41 162  
42

43 163  
44

45 164  
46

47 165  
48

49 166  
50

51 167  
52  
53  
54  
55  
56  
57  
58  
59  
60

## 168 **METHODS**

### 169 **Subjects**

#### 170 *Inclusion criteria*

- 171 1. Adult patients 18y/o and older with an aneurysmal subarachnoid hemorrhage confirmed  
172 by a brain CT scan, CT angiography, magnetic resonance angiography, or digital  
173 subtraction angiography (Figure 2).
- 174 2. Admitted to the emergency department within 12 hours of the ictus.
- 175 3. Patients must have a World Federation of Neurological Surgeons (WFNS) score of I, II, or  
176 III at the initial examination.

#### 177 *Exclusion criteria*

- 178 1. Patients who have hypersensitivity to aspirin, ibuprofen, or other NSAIDs,
- 179 2. Previous and prolonged use of any type of NSAIDs other than aspirin,
- 180 3. History of aneurysmal re-bleeding, and active bleeding of a gastrointestinal ulcer,  
181 hemodynamic instability, pregnancy, and current consumption of antiplatelet agents such  
182 as clopidogrel and aspirin.
- 183 4. Patients with history of myocardial infarction (MI) or percutaneous coronary interventions.

### 184 **Outcome measures and follow-up**

185 The goal of the current pilot trial is to establish the feasibility of a larger trial by successfully  
186 recruiting 30 participants over a 12-month period and demonstrating adherence to our study  
187 protocol. Based on the effect estimates coming out of this pilot study, we will calculate a proper  
188 sample size for the definitive trial. Specific feasibility objectives include determining:

- 189 1. Our ability to recruit 30 participants over twelve months
- 190 2. Our ability to follow 85% of participants for three months

1  
2  
3 191 3. Whether at least 75% of participants comply with at least 75% of the study protocol  
4  
5

6 192 **Objectives for the Definitive Trial**  
7

8  
9 193 The primary research objective is:

10  
11 194 To determine the effects of Ibuprofen versus placebo on the rate of all-cause mortality  
12

13 195 The secondary research objectives are:

14  
15 196 1. To assess whether the administration of ibuprofen in patients with aSAH, could prevent  
16  
17 197 the occurrence of cerebral vasospasm versus placebo.

18  
19  
20 198 2. To determine the effects of Ibuprofen versus placebo on the occurrence of delayed  
21  
22 199 cerebral ischemia.

23  
24  
25 200 3. To elucidate the effects of Ibuprofen versus placebo on the level of disability based on  
26  
27 201 modified Rankin Scale (mRS) at three-month follow-up.  
28  
29

30 202 **Study description**  
31

32 203 The patients will be hospitalized for at least 14 days because the maximum inflammation in the  
33  
34 204 subarachnoid space occurs between days 9 to 14. Based on our institutional protocol for the  
35  
36 205 management of SAH, nimodipine 60 mg every 4 hours for 21 days, appropriate fluid therapy,  
37  
38 206 and phenytoin will be administered for all patients, and microsurgical aneurysmal clipping in  
39  
40  
41 207 patients presenting with large (>50mL) intraparenchymal hematomas and middle cerebral artery  
42  
43 208 aneurysms, or interventional coiling will be performed for elderly (>70 years of age) patients, in  
44  
45 209 those presenting with poor-grade aSAH, and in those with aneurysms of the basilar apex<sup>25</sup>.

46  
47  
48 210 In the Ibuprofen arm, eligible patients (**Supplemental digital content, part 1**) will receive  
49  
50 211 Ibuprofen capsules 400mg/every 6 hours for 14 days, added to standard treatment (Figure 3).  
51  
52 212 Manufactured ibuprofen capsules will be administered orally in the intervention group. This  
53  
54  
55 213 dosage is an anti-inflammatory dose of ibuprofen and placed in the middle of the therapeutic  
56  
57  
58  
59  
60

1  
2  
3 214 window of this drug. In the control group, placebo capsules that are manufactured identical to the  
4  
5 215 ibuprofen capsules in terms of color, size, and shape; will be ordered in the same way as the  
6  
7 216 intervention group. In subjects who are lethargic or have impaired consciousness, medication and  
8  
9 217 placebo will be administered through enteral tube. The criteria for the evaluation of vasospasm  
10  
11 218 and the scales used for assessing disability are discussed in **Supplemental digital content, part**  
12  
13 219 **2.**  
14  
15  
16  
17

## 18 220 **Randomization and Allocation**

19  
20 221 To protect the blinding and integrity of the study (**Supplemental digital content, part 3**), a  
21  
22 222 statistician who is not affiliated to the research team develops the randomization plan. The  
23  
24 223 statistician will generate a permuted block randomization table using an online random sequence  
25  
26 224 generator with an allocation list in random order. The allocation ratio is 1:1. An independent  
27  
28 225 investigator allocates participants into two groups. The allocator uses an online computer-based  
29  
30 226 randomization program (<http://www.randomization.com>) to randomize permutation<sup>26</sup>. In the  
31  
32 227 first step, the statistician uses Randomization.com's pseudo-random number generator of  
33  
34 228 Wichmann and Hill (1982) as modified by McLeod to specify a treatment (A or B) to each  
35  
36 229 participant file numbered 1 to 30. In the second step, an independent investigator will provide a  
37  
38 230 random permutation of all of the integers from the smallest to the largest by the program. The  
39  
40 231 independent investigator gives a file to each participant by the order provided in the previous  
41  
42 232 step. The allocator will pick up a covered, sealed envelope from a box in which sequentially  
43  
44 233 numbered envelopes are shuffled. Patients will receive drug A or B according to the method of  
45  
46 234 allocation mentioned above.  
47  
48  
49  
50  
51  
52  
53  
54  
55  
56  
57  
58  
59  
60

### 235 **Sample size**

236 Our sample size is based on the confidence interval around the proportion of complete follow-up.  
237 We will consider the pilot successful if we achieved at least 85% follow-up at three months for  
238 our primary trial outcomes. If 29/30 participants achieve successful follow-up, the lower  
239 boundary of the 95% confidence interval will be above 85%, and we will consider the trial  
240 feasible. If less than 22/30 achieve complete follow-up, the upper boundary of the confidence  
241 interval will be below 85%, and we will consider the trial unfeasible. Therefore, if between 22  
242 and 29 out of 30 patients complete a 3-month follow-up, the feasibility of the trial will remain  
243 uncertain; however, we will consider this satisfactory.

### 244 **Data Management and Statistical Analysis**

245 The analysis and reporting of results will follow the CONSORT guidelines for reporting of  
246 randomised pilot and feasibility trials<sup>27</sup>. Data will be collected on forms and archived in a  
247 password-protected encrypted electronic database. All recruited and randomized patients will be  
248 included in the analysis. Data analysis will be performed by a blinded investigator with treatment  
249 groups coded as A and B. All data collected will be summarised for reporting purposes using  
250 descriptive statistics.

### 251 **Feasibility analysis (Primary)**

252 Data will be collected on forms and archived in a password-protected encrypted electronic  
253 database. Point estimates of recruitment and feasibility events, including adherence to protocol  
254 and follow-up rate at three months, will be presented as proportions with 95% CIs. The pilot  
255 study results will be evaluated to identify recruitment issues, data management issues, and  
256 inform anticipated follow-up rates.

### 257 **Efficacy Analysis for Definitive Study (Secondary)**

258 We plan to include the data from our pilot in the definitive trial if we can demonstrate feasibility,  
259 assuming no important changes to our patient population, intervention, or outcome measures. All  
260 patients enrolled in the trial and randomised will be included in the analysis, regardless of the  
261 level of adherence to the intervention or any other deviation from the protocol. Due to the low  
262 power of the pilot study, we will report the descriptive results for all efficacy- and harm-related  
263 outcomes. We will not complete any subgroup, sensitivity, or interim analysis due to the small  
264 sample size.

### 265 **Quality Assurance**

266 The principal investigator along with a member of institutional ethics committee will  
267 systematically monitor and evaluate the various aspects of project to ensure standards of quality  
268 are met. Standards of quality include Good Clinical Practice Guidelines, ethical conduct for  
269 Research, study protocol and institutional policies. All investigators will participate in a training  
270 session before the commencement of the study to ensure about the consistency of data collection  
271 and study procedures. Data will be managed in a secured computer system by a dedicated  
272 neurosurgery resident under the supervision of the principal investigator. In case of any doubt or  
273 uncertainty about data forms, the site investigators will be informed.  
274 Also, for further assurance, multiple checkpoints are defined during the trial, including the  
275 presence of signed informed consents obtained by the neurosurgery residents, respect of the  
276 inclusion and exclusion criteria, appropriate and instant reporting of any adverse events, and the  
277 monitoring of all steps of the follow-up. All the files and data will be sealed and archived in a  
278 secure place at the end of the trial, once the final analysis is completed.

## 279 **Trial Status**

280 The trial is in the recruitment phase and patient enrolment is planned to be completed in March  
281 2022, and the last recruited patient will be due for final outcome assessment in June 2022.

## 282 **Safety Considerations**

283 Concerning complications of NSAIDs, patients are classified into three categories: low,  
284 moderate, and high risk<sup>28</sup>. Low-risk patients are younger than 65 years without any  
285 cardiovascular risk factors. Moderate-risk patients are those 65 years of age or older without a  
286 history of gastrointestinal ulcer and had mild cardiovascular risk factors. Patients who are over  
287 65 years old who have kidney or liver diseases or hypertension, having a history of a  
288 gastrointestinal ulcer or multiple gastrointestinal risk factors, history of cardiovascular diseases  
289 and consume aspirin or other antiplatelets as secondary prevention, as well as having a history of  
290 heart failure are considered as a high-risk patient<sup>28</sup>. In the first group, routine care will be  
291 provided. Pantoprazole is given in a moderate risk group along with ibuprofen. In this group, a  
292 low dose aspirin (75 to 81 mg) will be administered in case of previous consumption, and it is  
293 given with a two-hour gap after taking one of the doses of ibuprofen. Likewise, pantoprazole is  
294 given in the high-risk group if the patient did not take antiplatelet medications, such as  
295 clopidogrel. In this group, blood pressure, urea, creatinine, and electrolytes will be monitored.  
296 Thus, all patients in the three groups receive ibuprofen with the same dose. The blood pressure of  
297 the patients in the moderate and high-risk groups will be monitored. Moreover, urea, creatinine,  
298 and electrolytes (sodium, potassium) of moderate-risk patients will be measured every three  
299 days, while the same tests will be requested for the high-risk group every day <sup>28</sup>.

1  
2  
3 300 Four comprehensive sections regarding the management and reporting of major adverse events  
4  
5 301 are provided in the **Supplemental digital content, parts 4, 5, and 6.**  
6  
7  
8  
9

### 10 302 **Follow-up**

11  
12 303 The clinical team will do in person follow up with the patients every day for any adverse events  
13  
14 304 during initial admission and weekly for the first three weeks if discharged. A 3- month in person  
15  
16 305 visit or phone interview is arranged for the assessment of disability outcomes and possible  
17  
18 306 adverse events. Contact information will be available for the enrolled patients for questions or  
19  
20  
21 307 possible adverse event reports during the study period.  
22  
23  
24

### 25 308 **Expected Outcomes of the study**

26  
27  
28 309 The key expected result of this pilot study is the feasibility and safety assessment of the  
29  
30 310 administration of Ibuprofen in patients with aSAH. The objectives of the definitive trial are  
31  
32 311 mentioned in the methods section. During the pilot trial, we will collect information on all  
33  
34 312 outcomes for the definitive trial.  
35  
36  
37

### 38 313 **Duration of the Project**

39  
40 314 This project is scheduled to last 24 months. First patient recruited at June 2020 and the last one is  
41  
42 315 planned to be included by March 2022, the end of the follow-up period for the last patient would  
43  
44 316 be June 2022.  
45  
46  
47

### 48 317 **Project Management**

49  
50 318 Principal investigator: Oversight of all study procedures and managing the relations with the  
51  
52 319 source of funding.  
53  
54  
55  
56  
57  
58  
59  
60



1  
2  
3 320 Research scientist: Study design, drafting of the proposal, RCT registration, drafting of the  
4  
5 321 manuscript.

6  
7  
8 322 Study coordinator: Blinding, randomization of the participants, organizing datasheets,  
9  
10 323 coordinating members of the team.

11  
12 324 Neurosurgery residents: Check patients' eligibility, consenting, assessing clinical DCI,  
13  
14 325 diagnosing, and managing of the adverse events, order TCD, and Ibuprofen.

15  
16  
17 326 Neurologist: A clinical stroke fellow will do the TCD.

18  
19 327 Statistician: Assistance regarding study design, revising the manuscript, data analysis.

20  
21  
22 328

23  
24 329 **Ethics and dissemination**

25  
26 330 This study is approved by Mashhad University of Medical Sciences (MUMS) ethical committee  
27  
28 331 (IR.MUMS.MEDICAL.REC.1398.225). Written informed consent will be obtained from the  
29  
30 332 eligible patients or next of kin for enrollment to the study.

31  
32  
33  
34 333 **Dissemination policy**

35  
36 334 Results from the study will be submitted for publication regardless of whether or not there are  
37  
38 335 significant findings. Every attempt will be made to ensure that the amount of time between  
39  
40 336 completing data collection and the release of study findings is minimized. The Methods Centre  
41  
42 337 will also be responsible for reporting required results on the ISRCTN registry.

43  
44  
45 338

46  
47  
48 339 **Patient and public involvement**

49  
50 340 Patients and public were not involved in this study.

1  
2  
3 341 **DISCUSSION**  
4

5 342 Cerebral vasospasm is a common devastating complication of the aSAH. Pharmacological  
6  
7 343 management of this clinical problem is still a controversial issue.  
8

9  
10 344 We have found some pieces of evidence through in vitro <sup>29</sup>, animal <sup>18 30</sup>, and human <sup>31 32</sup> studies  
11  
12 345 indicating that some NSAIDs might be a promising choice to be used as a repurposing approved  
13  
14 346 agent for the prevention of cerebral vasospasm secondary to aSAH.  
15

16  
17 347 In a propensity score-matched analysis study by Nassiri et al. <sup>31</sup>, consumption of NSAIDs with  
18  
19 348 various therapeutic indications was assessed in patients with aSAH. Results demonstrated a  
20  
21 349 reduction in mortality and improved functional outcomes <sup>24</sup>. These effects were independent of  
22  
23 350 the development of DCI or vasospasm. Furthermore, patients treated with NSAIDs had reduced  
24  
25 351 ICU and hospital stay. The authors hypothesized that inflammation may have a critical role in  
26  
27 352 development of poor outcomes (disability and death) after aSAH and patients with aSAH may  
28  
29 353 find some benefit from NSAIDs.  
30  
31

32  
33 354 A large, high-quality trial is needed to establish whether adding ibuprofen to standard treatment  
34  
35 355 effectively reduces vasospasm after aSAH. Such a trial poses fundamental challenges for  
36  
37 356 methodological design as well as complexities of execution. Thus, a prerequisite pilot trial is  
38  
39 357 required to justify if the preliminary plan can be implemented in a larger definitive trial.  
40  
41

42 358 Ibuprofen is an FDA-approved anti-inflammatory medication; however, using it in a new clinical  
43  
44 359 condition as a repurposing approved agent to prevent cerebral vasospasm requires further  
45  
46 360 evaluation. Since there is no previous phase III trial for this purpose, we planned to run  
47  
48 361 feasibility pilot study before the definitive trial.  
49  
50

51  
52 362  
53  
54

55 363  
56  
57  
58  
59  
60

1  
2  
3 364 **Acknowledgements**  
4

5 365 We appreciate the deputy of research at Mashhad University of Medical Sciences for the financial  
6  
7  
8 366 support of this project.  
9

10  
11 367 **Authors contribution**  
12

13  
14 368 SZ and MD conceptualized the study. MD, EM, VA, and BS designed the study, EM and MJY  
15  
16 369 coordinated the administrative tasks. EM, MD did the literature search, and drafted the initial  
17  
18 370 version of the manuscript. MD designed the concept map and all figures. JG, NG, and SZ and all  
19  
20  
21 371 authors critically reviewed and approved the final manuscript as submitted.  
22  
23

24 372 **Funding source**  
25

26 373 Mashhad University of Medical Sciences, deputy of research, Grant No.971587.  
27  
28

29 374 **Declaration of interests**  
30

31 375 All authors declare no conflict of interest.  
32  
33

34 376  
35

36  
37 377 **Figures and legends**  
38

39  
40 378 **Figure 1: Concept map depicting four major pathways for the occurrence of cerebral vasospasm**  
41  
42 379 **following aSAH.** Inflammatory pathway is shown in yellow and explains how Ibuprofen may act as a  
43  
44 380 prophylactic agent in this scenario. Numbers in parentheses are representative of corresponding reference  
45  
46 381 for that branch, all concept map references are available in **Supplemental digital content, part 7.**  
47  
48

49 382 **Figure 2. Step-by-step flow diagram of the study**  
50

51  
52 383 **Figure 3. Timeline of the study**  
53

54  
55 384  
56  
57  
58  
59  
60

- 1  
2  
3 385 **Supplemental Digital Content (SDC) #. Medium. Title.**  
4  
5  
6 386 **SDC, part 1, Text, Enrolment**  
7  
8  
9 387 **SDC, part 2, Text, Criteria for the evaluation of vasospasm and disability**  
10  
11  
12 388 **SDC, part 3, Text, Blinding**  
13  
14  
15 389 **SDC, part 4, Text, Adverse events definition**  
16  
17 390 **SDC, part 5, Text, Serious adverse events**  
18  
19  
20 391 **SDC, part 6, Text, Adverse Event (AE) Reporting**  
21  
22  
23 392 **SDC, part 7, Text, References of the concept map**  
24  
25 393 **SDC, part 8, Text, References for supplementary text**  
26  
27  
28 394  
29  
30  
31 395  
32  
33  
34 396  
35  
36  
37 397  
38  
39  
40  
41 398  
42  
43  
44 399  
45  
46  
47 400  
48  
49  
50 401  
51  
52  
53 402  
54  
55  
56  
57  
58  
59  
60

403 **References**

1. Feigin VL, Lawes CM, Bennett DA, et al. Worldwide stroke incidence and early case fatality reported in 56 population-based studies: a systematic review. *Lancet Neurol* 2009;8(4):355-69. doi: 10.1016/s1474-4422(09)70025-0 [published Online First: 2009/02/24]
2. Nieuwkamp DJ, Setz LE, Algra A, et al. Changes in case fatality of aneurysmal subarachnoid haemorrhage over time, according to age, sex, and region: a meta-analysis. *Lancet Neurol* 2009;8(7):635-42. doi: 10.1016/S1474-4422(09)70126-7
3. Mayberg MR. Cerebral vasospasm. *Neurosurg Clin N Am* 1998;9(3):615-27. [published Online First: 1998/07/21]
4. Claassen J, Bernardini GL, Kreiter K, et al. Effect of cisternal and ventricular blood on risk of delayed cerebral ischemia after subarachnoid hemorrhage: the Fisher scale revisited. *Stroke* 2001;32(9):2012-20. [published Online First: 2001/09/08]
5. Kreiter KT, Copeland D, Bernardini GL, et al. Predictors of cognitive dysfunction after subarachnoid hemorrhage. *Stroke* 2002;33(1):200-8. [published Online First: 2002/01/10]
6. Mocco J, Zacharia BE, Komotar RJ, et al. A review of current and future medical therapies for cerebral vasospasm following aneurysmal subarachnoid hemorrhage. *Neurosurg Focus* 2006;21(3):E9. [published Online First: 2006/10/13]
7. Belen D, Besalti O, Yigitkanli K, et al. Leflunomide prevents vasospasm secondary to subarachnoid haemorrhage. *Acta Neurochir (Wien)* 2007;149(10):1041-7; discussion 47-8. doi: 10.1007/s00701-007-1275-1 [published Online First: 2007/09/19]
8. Vural M, Cosan TE, Ozbek Z, et al. Digoxin may provide protection against vasospasm in subarachnoid haemorrhage. *Acta Neurochir (Wien)* 2009;151(9):1135-41. doi: 10.1007/s00701-009-0391-5 [published Online First: 2009/05/14]
9. Gunaldi O, Tugcu B, Colluoglu B, et al. Morphometric analysis of the influence of selenium over vasospastic femoral artery in rats. *Acta Neurochir (Wien)* 2010;152(5):855-60. doi: 10.1007/s00701-010-0599-4 [published Online First: 2010/02/04]
10. Polin RS, Bavbek M, Shaffrey ME, et al. Detection of soluble E-selectin, ICAM-1, VCAM-1, and L-selectin in the cerebrospinal fluid of patients after subarachnoid hemorrhage. *J Neurosurg* 1998;89(4):559-67. doi: 10.3171/jns.1998.89.4.0559 [published Online First: 1998/10/07]
11. Chaichana KL, Pradilla G, Huang J, et al. Role of inflammation (leukocyte-endothelial cell interactions) in vasospasm after subarachnoid hemorrhage. *World Neurosurg* 2010;73(1):22-41. doi: 10.1016/j.surneu.2009.05.027 [published Online First: 2010/05/11]
12. Muroi C, Hugelshofer M, Seule M, et al. Correlation among systemic inflammatory parameter, occurrence of delayed neurological deficits, and outcome after aneurysmal subarachnoid hemorrhage. *Neurosurgery* 2013;72(3):367-75; discussion 75. doi: 10.1227/NEU.0b013e31828048ce [published Online First: 2012/12/05]
13. Tam AK, Ilodigwe D, Mocco J, et al. Impact of systemic inflammatory response syndrome on vasospasm, cerebral infarction, and outcome after subarachnoid hemorrhage: exploratory analysis of CONSCIOUS-1 database. *Neurocrit Care* 2010;13(2):182-9. doi: 10.1007/s12028-010-9402-x [published Online First: 2010/07/02]
14. Ibrahim GM, Morgan BR, Macdonald RL. Patient phenotypes associated with outcomes after aneurysmal subarachnoid hemorrhage: a principal component analysis. *Stroke* 2014;45(3):670-6. doi: 10.1161/strokeaha.113.003078 [published Online First: 2014/01/16]
15. Larson RS, Springer TA. Structure and function of leukocyte integrins. *Immunol Rev* 1990;114:181-217. [published Online First: 1990/04/01]
16. de Fougerolles AR, Stacker SA, Schwarting R, et al. Characterization of ICAM-2 and evidence for a third counter-receptor for LFA-1. *J Exp Med* 1991;174(1):253-67. doi: 10.1084/jem.174.1.253 [published Online First: 1991/07/01]

- 1  
2  
3 451 17. Lollo BA, Chan KW, Hanson EM, et al. Direct evidence for two affinity states for lymphocyte function-  
4 452 associated antigen 1 on activated T cells. *J Biol Chem* 1993;268(29):21693-700. [published Online  
5 453 First: 1993/10/15]
- 6 454 18. Frazier JL, Pradilla G, Wang PP, et al. Inhibition of cerebral vasospasm by intracranial delivery of  
7 455 ibuprofen from a controlled-release polymer in a rabbit model of subarachnoid hemorrhage. *J*  
8 456 *Neurosurg* 2004;101(1):93-8. doi: 10.3171/jns.2004.101.1.0093 [published Online First:  
9 457 2004/07/17]
- 10 458 19. Young AM, Karri SK, Ogilvy CS. Non-steroidal anti-inflammatory drugs used as a treatment modality  
11 459 in subarachnoid hemorrhage. *Curr Drug Saf* 2012;7(3):197-201. [published Online First:  
12 460 2012/09/07]
- 13 461 20. Mendelow AD, Stockdill G, Steers AJ, et al. Double-blind trial of aspirin in patient receiving tranexamic  
14 462 acid for subarachnoid hemorrhage. *Acta Neurochir (Wien)* 1982;62(3-4):195-202. [published  
15 463 Online First: 1982/01/01]
- 16 464 21. Hop JW, Rinkel GJ, Algra A, et al. Randomized pilot trial of postoperative aspirin in subarachnoid  
17 465 hemorrhage. *Neurology* 2000;54(4):872-8. doi: 10.1212/wnl.54.4.872 [published Online First:  
18 466 2000/02/26]
- 19 467 22. van den Bergh WM, Algra A, Dorhout Mees SM, et al. Randomized controlled trial of acetylsalicylic  
20 468 acid in aneurysmal subarachnoid hemorrhage: the MASH Study. *Stroke* 2006;37(9):2326-30. doi:  
21 469 10.1161/01.STR.0000236841.16055.0f [published Online First: 2006/08/05]
- 22 470 23. Ghodsi SM, Mohebbi N, Naderi S, et al. Comparative efficacy of meloxicam and placebo in vasospasm  
23 471 of patients with subarachnoid hemorrhage. *Iranian journal of pharmaceutical research : IJPR*  
24 472 2015;14(1):125-30. [published Online First: 2015/01/07]
- 25 473 24. Chan AW, Tetzlaff JM, Gøtzsche PC, et al. SPIRIT 2013 explanation and elaboration: guidance for  
26 474 protocols of clinical trials. *BMJ (Clinical research ed)* 2013;346:e7586. doi: 10.1136/bmj.e7586  
27 475 [published Online First: 2013/01/11]
- 28 476 25. Connolly ES, Jr., Rabinstein AA, Carhuapoma JR, et al. Guidelines for the management of aneurysmal  
29 477 subarachnoid hemorrhage: a guideline for healthcare professionals from the American Heart  
30 478 Association/american Stroke Association. *Stroke* 2012;43(6):1711-37. doi:  
31 479 10.1161/STR.0b013e3182587839
- 32 480 26. Lachin JM, Matts JP, Wei L. Randomization in clinical trials: conclusions and recommendations.  
33 481 *Controlled clinical trials* 1988;9(4):365-74.
- 34 482 27. Eldridge SM, Chan CL, Campbell MJ, et al. CONSORT 2010 statement: extension to randomised pilot  
35 483 and feasibility trials. *BMJ* 2016;355:i5239. doi: 10.1136/bmj.i5239
- 36 484 28. Crofford LJ. Use of NSAIDs in treating patients with arthritis. *Arthritis research & therapy* 2013;15  
37 485 Suppl 3:S2. doi: 10.1186/ar4174 [published Online First: 2013/12/07]
- 38 486 29. Kapiotis S, Sengoelge G, Sperr WR, et al. Ibuprofen inhibits pyrogen-dependent expression of VCAM-1  
39 487 and ICAM-1 on human endothelial cells. *Life Sci* 1996;58(23):2167-81.
- 40 488 30. White RP, Robertson JT. Comparison of piroxicam, meclofenamate, ibuprofen, aspirin, and  
41 489 prostacyclin efficacy in a chronic model of cerebral vasospasm. *Neurosurgery* 1983;12(1):40-6.  
42 490 doi: 10.1227/00006123-198301000-00008
- 43 491 31. Nassiri F, Ibrahim GM, Badhiwala JH, et al. A Propensity Score-Matched Study of the Use of Non-  
44 492 steroidal Anti-inflammatory Agents Following Aneurysmal Subarachnoid Hemorrhage. *Neurocrit*  
45 493 *Care* 2016;25(3):351-58. doi: 10.1007/s12028-016-0266-6 [published Online First: 2016/03/24]
- 46 494 32. Muroi C, Hugelshofer M, Seule M, et al. The impact of nonsteroidal anti-inflammatory drugs on  
47 495 inflammatory response after aneurysmal subarachnoid hemorrhage. *Neurocritical care*  
48 496 2014;20(2):240-6. doi: 10.1007/s12028-013-9930-2

497

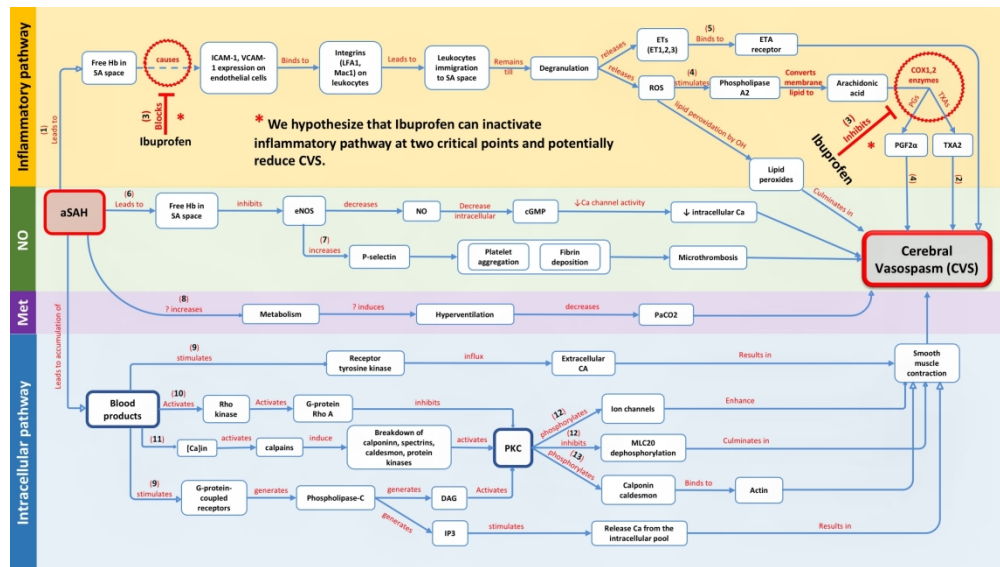

Figure 1. Concept map depicting four major pathways for the occurrence of cerebral vasospasm following aSAH. Inflammatory pathway is shown in yellow and explains how Ibuprofen may act as a prophylactic agent in this scenario. Numbers in parentheses are representative of corresponding reference for that branch, all concept map references are available in Supplemental digital content, part 7.

1057x595mm (72 x 72 DPI)

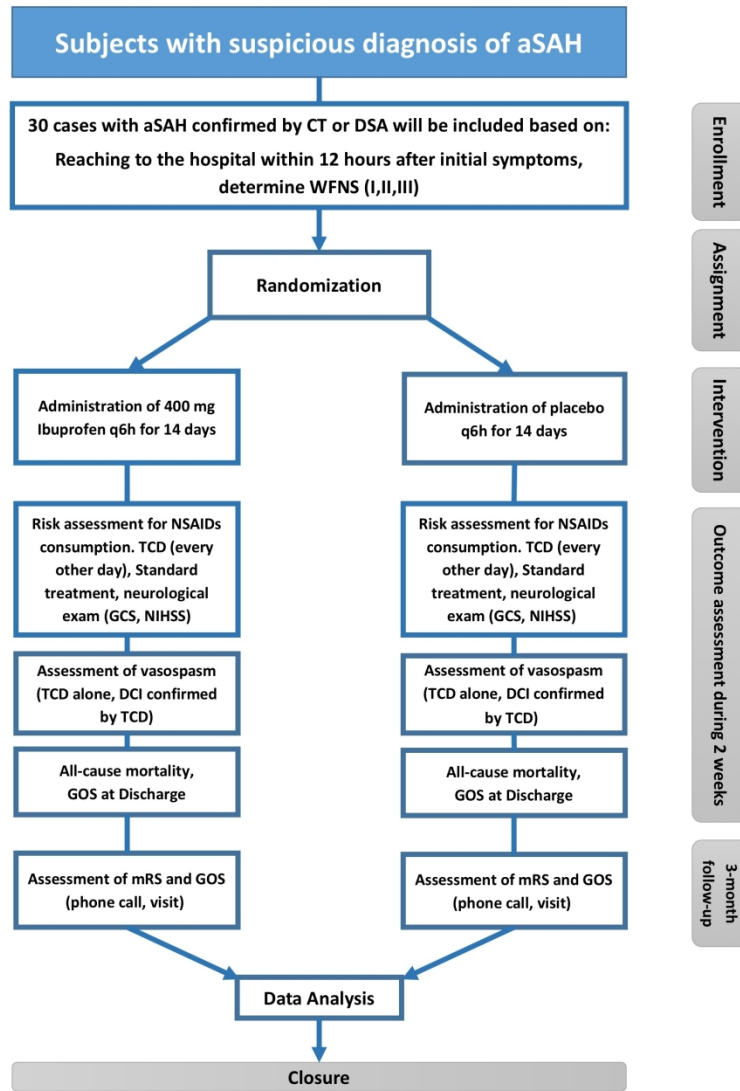

Figure 2. Step-by-step flow diagram of the study

190x254mm (300 x 300 DPI)



1  
2  
3  
4  
5  
6  
7  
8  
9  
10  
11  
12  
13  
14  
15  
16  
17  
18  
19  
20  
21  
22  
23  
24  
25  
26  
27  
28  
29  
30  
31  
32  
33  
34  
35  
36  
37  
38  
39  
40  
41  
42  
43  
44  
45  
46  
47  
48  
49  
50  
51  
52  
53  
54  
55  
56  
57  
58  
59  
60

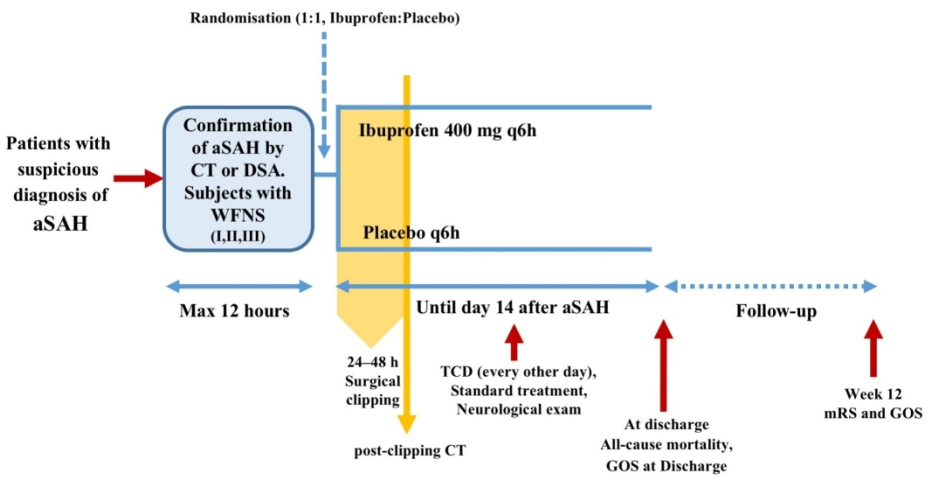

Timeline of the study

703x386mm (72 x 72 DPI)

## Supplemental digital content (SDC)

### Prophylactic effects of Ibuprofen on cerebral vasospasm following aneurysmal subarachnoid hemorrhage: Protocol for a randomised placebo-controlled pilot trial

#### Authors:

Mojtaba Dayyani<sup>1,2</sup>, Ermia Mousavi Mohammadi<sup>2</sup>, Vahid Ashoorion<sup>3</sup>, Behnam Sadeghirad<sup>3</sup>, Mohammadreza javedani yekta<sup>2</sup>, James Grotta<sup>4</sup>, Nestor Gonzalez<sup>5</sup>, Samira Zabihyan<sup>2,\*</sup>

#### Table of Contents

|                                                                             |          |
|-----------------------------------------------------------------------------|----------|
| <b>SDC, PART 1. ENROLMENT</b>                                               | <b>2</b> |
| <b>SDC, PART 2. CRITERIA FOR THE EVALUATION OF VASOSPASM AND DISABILITY</b> | <b>2</b> |
| <b>SDC, PART 3. BLINDING</b>                                                | <b>3</b> |
| <b>SDC, PART 4. ADVERSE EVENTS DEFINITION</b>                               | <b>4</b> |
| <b>SDC, PART 5. SERIOUS ADVERSE EVENTS</b>                                  | <b>4</b> |
| <b>SDC, PART 6. ADVERSE EVENT (AE) REPORTING</b>                            | <b>6</b> |
| <b>SDC, PART 7. REFERENCES OF THE CONCEPT MAP</b>                           | <b>6</b> |
| <b>SDC, PART 8. REFERENCES FOR SUPPLEMENTARY TEXT</b>                       | <b>7</b> |

## SDC, part 1. Enrolment

Patient screening for eligibility and recruitment will be conducted at Ghaem Teaching Hospital, Mashhad, Iran. Two neurosurgery residents will first visit the patients and check the eligibility criteria in the emergency department. The neurosurgical intensive care unit of our center annually receives 100–150 patients with aSAH. Over twelve months, 30 eligible patients will be enrolled in our trial.

The recruited patient who met the criteria will sign and date the institutional informed consent form of the Mashhad University of Medical Sciences before allocating to each group and before initiation of any procedures related to the clinical investigation are performed. Then, required data will be gathered in specific datasheets, including demographic data (name, age, gender, address, and phone number), past medical history including cardiovascular, kidney, and liver diseases, previous episode of SAH, drug history including long term and recent use of any NSAIDs, anti-platelet medications and sensitivity to aspirin or any NSAIDs. Two nurses of the hospital's intensive care unit will fill case report forms (CRFs) and gather these data. In the absence of exclusion criteria, a file will be specified to each patient that contains a registration form, consent form, diagnostic form, and a 3-months follow-up evaluation sheet.

CRFs will be kept in a file that assigns to each patient. The research coordinator enters data from forms to a data management tool. Only the research coordinator has access to data in a password-protected spreadsheet till the study will be terminated. After this period, the research coordinator will send the spreadsheet to the method center located in the hospital. Also, to assess the patients' disability, a 3-months follow-up will be accomplished via a phone call or a clinic visit by two independent neurosurgery residents.

Participants who are unable to complete the protocol due to death, clinical complication, or being discharged for any reason will not be excluded from the study. The statisticians will apply the intention to treat analysis.

## SDC, part 2. Criteria for the evaluation of vasospasm and disability

Chronic vasospasm can occur clinically with signs and symptoms or non-clinically that would be diagnosed by imaging<sup>1</sup>. In this study, we defined clinical vasospasm as delayed cerebral ischemia (DCI) and diagnosed non-clinically by Transcranial Doppler (TCD). The flow velocity of the

1  
2  
3 middle cerebral artery (MCA) and the basilar artery is measured by TCD at the admission, then  
4 every two days. The timeline of the interventions is depicted in figure 3. In MCA, the flow velocity  
5 between 120-149 cm/s and Lindegaard ratio 3 to 6 was considered as mild vasospasm (25% vessel  
6 obstruction), velocity between 150-199 cm/s and Lindegaard ratio 3 to 6 as moderate vasospasm  
7 (50% obstruction) and a velocity more than or equal to 200 cm/s and a Lindegaard ratio greater  
8 than 6 as severe vasospasm (more than 50% occlusion). In the basilar artery, the flow velocity  
9 between 70-85 cm/s and Lindegaard ratio 2 to 2.49 was considered as mild vasospasm (25% vessel  
10 obstruction), the velocity greater than 85 cm/s, and Lindegaard ratio between 2.5 to 2.99 as  
11 moderate vasospasm (50% obstruction) and a velocity over 85 cm/s and the Lindegaard ratio  
12 greater than or equal to 3 as severe vasospasm (more than 50% obstruction)<sup>2</sup>. DCI is considered  
13 if the patient's neurological status deteriorates for at least 2 hours, and no reasons were found. The  
14 neurological deterioration is defined as one or more decrement of the Glasgow Coma Scale (GCS)  
15 score or increases at least two scores of the National Institutes of Health Stroke Scale (NIHSS)<sup>3</sup>;  
16 in this condition, vasospasm will be confirmed by TCD.  
17  
18  
19  
20  
21  
22  
23  
24  
25  
26  
27

28 Disability will be assessed at discharge and three months after discharge based on the Modified  
29 Rankin Scale (mRS). Favorable mRS outcomes are (mRS 1 and 2), and unfavorable outcomes  
30 are (mRS 3 to 6).  
31  
32  
33

### 34 SDC, part 3. Blinding

35 Participants of both groups will be blinded to take their correspondent medication or placebo. Also,  
36 ibuprofen and placebo will be packed in identical capsules, and they are not distinguishable by  
37 participants or study personnel.  
38  
39  
40  
41

42 The clinical team, including neurosurgeons, radiologists and, ICU department staff, and the  
43 neurologist who does TCD, are not aware of which group patients belong to. Outcomes will be  
44 recorded in a list based on patient allocation to either group A or B. Likewise, the statistician would  
45 not be aware of what data belongs to either the intervention or placebo groups in the final datasheet.  
46 Breaking of the treatment codes will be carried out three months after the inclusion of the last  
47 eligible patient. All outcome assessments will be performed before the treatment codes are broken.  
48  
49  
50  
51  
52  
53  
54  
55  
56  
57  
58  
59

#### SDC, part 4. Adverse events definition

Oral administration of ibuprofen has some common adverse reactions that their prevalence is ranged between 1-10%. In these conditions, it is not necessary to discontinue drug consumption. Edema due to fluid retention occurs in 1 to 3%. Central nervous system reactions included dizziness (3-9%), headache (1-3%), and nervousness (1-3%). Skin rashes (3-9%) and pruritus (1-3%) are dermatologic reactions that may occur by ibuprofen consumption. There are some adverse events in the gastrointestinal system which may arise from ibuprofen, including epigastric pain (3-9%), heartburn (3-9%), nausea (3-9%), abdominal pain (1-3%), constipation (1-3%), decreased appetite (1-3%), diarrhea (1-3%), dyspepsia (1-3%), vomiting (1-3%). Tinnitus is the otic complications which may happen by the prevalence of 3-9%<sup>5</sup>.

#### SDC, part 5. Serious adverse events

The first possible serious adverse events are cardiovascular thrombotic events, including myocardial infarction (MI). Another serious cardiovascular event is new-onset hypertension or exacerbation of hypertension<sup>6</sup>. We will strictly monitor blood pressure as a part of our routine management in the ICU, which helps us detect this event before its remarkable increment.

In general, using the lowest effective dose for the shortest duration of time might reduce the risk of cardiovascular events. In our study, these conditions are considered. In case of any clinical suspicion for MI, in the initial assessment phase, a 12-lead ECG, an abbreviated history, and physical examination will obtain within 10 minutes<sup>7</sup>. Then, the serum level of Troponin-I will be measured, and cardiology consultation will be requested for further evaluation or possible therapeutic interventions.

Gastrointestinal events, including an increased risk of ulceration, bleeding, and perforation, are the second possible serious adverse events. Elderly patients and patients with a history of peptic ulcer disease and/or GI bleeding are at greater risk for serious GI events<sup>8</sup>. We avoid enrolling patients with a history of acute GI bleeding. Concomitant gastro-protective therapy (e.g., proton pump inhibitors (PPIs)<sup>9</sup> is recommended; as mentioned in the safety section, we use PPIs for all study participants. For the initial evaluation of the patient with the signs of active upper GI bleeding, hemodynamic stability, and the necessity for fluid resuscitation will be assessed. Intravenous pantoprazole at the dose of 40 mg twice daily will be initiated for these patients<sup>10</sup>.

1  
2  
3 Endoscopy within 24 hours of presentation for the diagnosis and treatment of active upper GI  
4 bleeding will be accomplished <sup>11</sup>.

5  
6  
7 The third serious adverse event secondary to ibuprofen use is the accentuation of existing renal  
8 dysfunction that is dose-dependent <sup>9</sup>. The proposed criteria for acute kidney injury<sup>12</sup> include an  
9 increase in serum creatinine by  $\geq 0.3$  mg/dL within 48 hours or an increase to  $\geq 1.5$  times the  
10 presumed baseline value that is known to have occurred within the last seven days or a decrease  
11 in urine volume to  $< 3$  mL/kg over six hours <sup>13</sup>. The diagnosis of hemodynamically mediated AKI  
12 associated with NSAIDs is suggested by recent NSAID use, the absence of significant  
13 proteinuria ( $< 500$  mg/day), hematuria, and the bland urine sediment. Among patients with AKI,  
14 generally, a renal ultrasound will be done to exclude possible obstruction. In general, the  
15 diagnosis is made when kidney function recovery occurs after the NSAID is discontinued <sup>14</sup>. For  
16 the treatment of NSAID-induced AKI, the NSAID should be stopped immediately, volume  
17 resuscitation will be provided in states of hypovolemia and continued based on a reassessment of  
18 volume status including blood pressure/pulse and urine output <sup>15</sup>.

19  
20  
21 The fourth serious adverse event is anaphylactic reactions. The most common signs and  
22 symptoms are cutaneous (e.g. sudden onset of generalized urticarial, angioedema, flushing, and  
23 pruritus). Airway will be assessed at first <sup>16</sup>. Epinephrine will be given 0.3 to 0.5 mg  
24 intramuscularly (IM), which can be repeated every 5 to 15 minutes. Oxygen will be given 8-10  
25 L/min via face mask as needed. Hypotension, if occurs, will be managed via rapid infusion of 1  
26 to 2 liters intravenously. Adjunctive therapies including IV diphenhydramine 25 to 50 mg, IV  
27 ranitidine 50 mg, IV methylprednisolone 125 mg, and monitoring hemodynamic, pulse oximetry,  
28 and urine output will be considered as appropriate <sup>17-19</sup>.

#### 29 30 31 Unanticipated problems resulting in risk to participant or others

32  
33 Any incident, experience, or outcome that meets the following criteria:

- 34 • Unexpected in nature, severity, or frequency (e.g., not described in study-related documents such  
35 as the ethics-approved protocol or consent form, etc.).
  - 36 • Related or possibly related to participation in the research (i.e., possibly related means there is a  
37 reasonable possibility that the incident experience or outcome may have been caused by the  
38 procedures involved in the research), and suggests that the research places participants or others at  
39 greater risk of harm (including physical, psychological, economic, or social harm)
- 40  
41  
42  
43  
44  
45  
46  
47  
48  
49  
50  
51  
52  
53  
54  
55  
56  
57  
58  
59  
60

## SDC, part 6. Adverse Event (AE) Reporting

The clinical site (ICU nurse and neurosurgery resident) is responsible for reporting AEs to the Methods Centre promptly. Significant new information on ongoing AEs should also be provided promptly to the Methods Centre via the data capture system. Unanticipated problems resulting in risk to participants or others are also to be reported promptly to the Methods Centre.

The clinical site is responsible for reporting AEs and unanticipated problems resulting in risk to participants or others to their local ethics committee in accordance with local reporting requirements. Copies of each report and documentation of ethic board notification and receipt will be kept in the clinical site's study file. The Methods Centre will be responsible for reporting any applicable adverse events to the relevant regulatory bodies (e.g., Food and Drug organization, adverse events registration).

## SDC, part 7. References of the concept map

1. Chaichana KL, Pradilla G, Huang J, Tamargo RJ. Role of inflammation (leukocyte-endothelial cell interactions) in vasospasm after subarachnoid hemorrhage. *World Neurosurg.* 2010;73(1):22-41.
2. Viski S, Olah L. Use of Transcranial Doppler in Intensive Care Unit. *J Crit Care Med (Targu Mures).* 2017;3(3):99-104.
3. Nassiri F, Ibrahim GM, Badhiwala JH, et al. A Propensity Score-Matched Study of the Use of Non-steroidal Anti-inflammatory Agents Following Aneurysmal Subarachnoid Hemorrhage. *Neurocrit Care.* 2016;25(3):351-358.
4. Ibuprofen: Drug information. In: *UpToDate.* 2017.
5. Brooks PM, Day RO. Nonsteroidal antiinflammatory drugs—differences and similarities. *New England Journal of Medicine.* 1991;324(24):1716-1725.
6. Thygesen K, Alpert JS, Jaffe AS, Simoons ML, Chaitman BR, White HD. Third universal definition of myocardial infarction. *Circulation.* 2012;126(16):2020-2035.
7. Bhatt DL, Scheiman J, Abraham NS, et al. ACCF/ACG/AHA 2008 expert consensus document on reducing the gastrointestinal risks of antiplatelet therapy and NSAID use: a report of the American College of Cardiology Foundation Task Force on Clinical Expert Consensus Documents. *Journal of the American College of Cardiology.* 2008;52(18):1502-1517.
8. Huerta C, Castellsague J, Varas-Lorenzo C, Rodríguez LAG. Nonsteroidal anti-inflammatory drugs and risk of ARF in the general population. *American Journal of Kidney Diseases.* 2005;45(3):531-539.
9. Sachar H, Vaidya K, Laine L. Intermittent vs continuous proton pump inhibitor therapy for high-risk bleeding ulcers: a systematic review and meta-analysis. *JAMA internal medicine.* 2014;174(11):1755-1762.

10. Marmo R, Rotondano G, Piscopo R, Bianco MA, D'angella R, Cipolletta L. Dual therapy versus monotherapy in the endoscopic treatment of high-risk bleeding ulcers: a meta-analysis of controlled trials. *The American journal of gastroenterology*. 2007;102(2):279.
11. Shiba M, Suzuki H, Fujimoto M, et al. Role of platelet-derived growth factor in cerebral vasospasm after subarachnoid hemorrhage in rats. *Acta Neurochir Suppl*. 2013;115:219-223.
12. Chertow GM, Burdick E, Honour M, Bonventre JV, Bates DW. Acute kidney injury, mortality, length of stay, and costs in hospitalized patients. *Journal of the American Society of Nephrology*. 2005;16(11):3365-3370.
13. Whelton A, Stout RL, Spilman PS, Klassen DK. Renal effects of ibuprofen, piroxicam, and sulindac in patients with asymptomatic renal failure: a prospective, randomized, crossover comparison. *Annals of Internal Medicine*. 1990;112(8):568-576.
14. Luciano R. NSAIDs: Acute kidney injury (acute renal failure). In: Palevsky PM, Sheridan A, eds. *UpToDate*. 2017.
15. Bock SA, Muñoz-Furlong A, Sampson HA. Further fatalities caused by anaphylactic reactions to food, 2001-2006. *Journal of Allergy and Clinical Immunology*. 2007;119(4):1016.
16. Simons FER, Gu X, Simons KJ. Epinephrine absorption in adults: intramuscular versus subcutaneous injection. *Journal of Allergy and Clinical Immunology*. 2001;108(5):871-873.
17. Pumphrey RS. Fatal posture in anaphylactic shock. *Journal of Allergy and Clinical Immunology*. 2003;112(2):451-452.
18. Simons KJ, Simons FER. Epinephrine and its use in anaphylaxis: current issues. *Current opinion in allergy and clinical immunology*. 2010;10(4):354-361.

## SDC, part 8. References for supplementary text

1. Chaichana KL, Pradilla G, Huang J, Tamargo RJ. Role of inflammation (leukocyte-endothelial cell interactions) in vasospasm after subarachnoid hemorrhage. *World Neurosurg*. 2010;73(1):22-41.
2. Viski S, Olah L. Use of Transcranial Doppler in Intensive Care Unit. *J Crit Care Med (Targu Mures)*. 2017;3(3):99-104.
3. Nassiri F, Ibrahim GM, Badhiwala JH, et al. A Propensity Score-Matched Study of the Use of Non-steroidal Anti-inflammatory Agents Following Aneurysmal Subarachnoid Hemorrhage. *Neurocrit Care*. 2016;25(3):351-358.
4. Crofford LJ. Use of NSAIDs in treating patients with arthritis. *Arthritis Res Ther*. 2013;15 Suppl 3:S2.
5. Ibuprofen: Drug information. In: *UpToDate*. 2017.
6. Brooks PM, Day RO. Nonsteroidal antiinflammatory drugs—differences and similarities. *New England Journal of Medicine*. 1991;324(24):1716-1725.
7. Thygesen K, Alpert JS, Jaffe AS, Simoons ML, Chaitman BR, White HD. Third universal definition of myocardial infarction. *Circulation*. 2012;126(16):2020-2035.



- 1
- 2
- 3
- 4 8. Bhatt DL, Scheiman J, Abraham NS, et al. ACCF/ACG/AHA 2008 expert consensus
- 5 document on reducing the gastrointestinal risks of antiplatelet therapy and NSAID use: a
- 6 report of the American College of Cardiology Foundation Task Force on Clinical Expert
- 7 Consensus Documents. *Journal of the American College of Cardiology*.  
2008;52(18):1502-1517.
- 8
- 9 9. Huerta C, Castellsague J, Varas-Lorenzo C, Rodríguez LAG. Nonsteroidal anti-
- 10 inflammatory drugs and risk of ARF in the general population. *American Journal of*
- 11 *Kidney Diseases*. 2005;45(3):531-539.
- 12
- 13 10. Sachar H, Vaidya K, Laine L. Intermittent vs continuous proton pump inhibitor therapy
- 14 for high-risk bleeding ulcers: a systematic review and meta-analysis. *JAMA internal*
- 15 *medicine*. 2014;174(11):1755-1762.
- 16
- 17 11. Marmo R, Rotondano G, Piscopo R, Bianco MA, D'angella R, Cipolletta L. Dual therapy
- 18 versus monotherapy in the endoscopic treatment of high-risk bleeding ulcers: a meta-
- 19 analysis of controlled trials. *The American journal of gastroenterology*. 2007;102(2):279.
- 20
- 21 12. Shiba M, Suzuki H, Fujimoto M, et al. Role of platelet-derived growth factor in cerebral
- 22 vasospasm after subarachnoid hemorrhage in rats. *Acta Neurochir Suppl*. 2013;115:219-
- 23 223.
- 24
- 25 13. Chertow GM, Burdick E, Honour M, Bonventre JV, Bates DW. Acute kidney injury,
- 26 mortality, length of stay, and costs in hospitalized patients. *Journal of the American*
- 27 *Society of Nephrology*. 2005;16(11):3365-3370.
- 28
- 29 14. Whelton A, Stout RL, Spilman PS, Klassen DK. Renal effects of ibuprofen, piroxicam,
- 30 and sulindac in patients with asymptomatic renal failure: a prospective, randomized,
- 31 crossover comparison. *Annals of Internal Medicine*. 1990;112(8):568-576.
- 32
- 33 15. Luciano R. NSAIDs: Acute kidney injury (acute renal failure). In: Palevsky PM,
- 34 Sheridan A, eds. *UpToDate*. 2017.
- 35
- 36 16. Bock SA, Muñoz-Furlong A, Sampson HA. Further fatalities caused by anaphylactic
- 37 reactions to food, 2001-2006. *Journal of Allergy and Clinical Immunology*.  
2007;119(4):1016.
- 38
- 39 17. Simons FER, Gu X, Simons KJ. Epinephrine absorption in adults: intramuscular versus
- 40 subcutaneous injection. *Journal of Allergy and Clinical Immunology*. 2001;108(5):871-
- 41 873.
- 42
- 43 18. Pumphrey RS. Fatal posture in anaphylactic shock. *Journal of Allergy and Clinical*
- 44 *Immunology*. 2003;112(2):451-452.
- 45
- 46 19. Simons KJ, Simons FER. Epinephrine and its use in anaphylaxis: current issues. *Current*
- 47 *opinion in allergy and clinical immunology*. 2010;10(4):354-361.
- 48
- 49
- 50
- 51
- 52
- 53
- 54
- 55
- 56
- 57
- 58
- 59
- 60

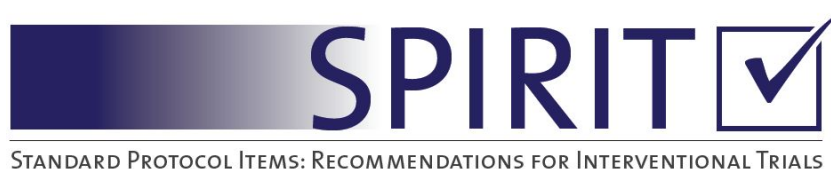

SPIRIT 2013 Checklist: Recommended items to address in a clinical trial protocol and related documents\*

| Section/item                      | Item No | Description                                                                                                                                                                                                                                                                              | Page No in the manuscript |
|-----------------------------------|---------|------------------------------------------------------------------------------------------------------------------------------------------------------------------------------------------------------------------------------------------------------------------------------------------|---------------------------|
| <b>Administrative information</b> |         |                                                                                                                                                                                                                                                                                          |                           |
| Title                             | 1       | Descriptive title identifying the study design, population, interventions, and, if applicable, trial acronym                                                                                                                                                                             | 1                         |
| Trial registration                | 2a      | Trial identifier and registry name. If not yet registered, name of intended registry                                                                                                                                                                                                     | 1                         |
|                                   | 2b      | All items from the World Health Organization Trial Registration Data Set                                                                                                                                                                                                                 | N/A                       |
| Protocol version                  | 3       | Date and version identifier                                                                                                                                                                                                                                                              | N/A                       |
| Funding                           | 4       | Sources and types of financial, material, and other support                                                                                                                                                                                                                              | 17                        |
| Roles and responsibilities        | 5a      | Names, affiliations, and roles of protocol contributors                                                                                                                                                                                                                                  | Title page and 17         |
|                                   | 5b      | Name and contact information for the trial sponsor                                                                                                                                                                                                                                       | Title page                |
|                                   | 5c      | Role of study sponsor and funders, if any, in study design; collection, management, analysis, and interpretation of data; writing of the report; and the decision to submit the report for publication, including whether they will have ultimate authority over any of these activities | None                      |
|                                   | 5d      | Composition, roles, and responsibilities of the coordinating centre, steering committee, endpoint adjudication committee, data management team, and other individuals or groups overseeing the trial, if applicable (see Item 21a for data monitoring committee)                         | 11, 14, 15                |
| <b>Introduction</b>               |         |                                                                                                                                                                                                                                                                                          |                           |
| Background and rationale          | 6a      | Description of research question and justification for undertaking the trial, including summary of relevant studies (published and unpublished) examining benefits and harms for each intervention                                                                                       | 5, 6                      |
|                                   | 6b      | Explanation for choice of comparators                                                                                                                                                                                                                                                    | 6, 9                      |

|    |                                                           |     |                                                              |             |
|----|-----------------------------------------------------------|-----|--------------------------------------------------------------|-------------|
| 1  |                                                           |     |                                                              |             |
| 2  | Objectives                                                | 7   | Specific objectives or hypotheses                            | 7, 8        |
| 3  |                                                           |     |                                                              |             |
| 4  | Trial design                                              | 8   | Description of trial design including type of trial (eg,     | 7           |
| 5  |                                                           |     | parallel group, crossover, factorial, single group),         |             |
| 6  |                                                           |     | allocation ratio, and framework (eg, superiority,            |             |
| 7  |                                                           |     | equivalence, noninferiority, exploratory)                    |             |
| 8  |                                                           |     |                                                              |             |
| 9  |                                                           |     |                                                              |             |
| 10 |                                                           |     |                                                              |             |
| 11 | <b>Methods: Participants, interventions, and outcomes</b> |     |                                                              |             |
| 12 |                                                           |     |                                                              |             |
| 13 | Study setting                                             | 9   | Description of study settings (eg, community clinic,         | 9           |
| 14 |                                                           |     | academic hospital) and list of countries where data will be  |             |
| 15 |                                                           |     | collected. Reference to where list of study sites can be     |             |
| 16 |                                                           |     | obtained                                                     |             |
| 17 |                                                           |     |                                                              |             |
| 18 | Eligibility                                               | 10  | Inclusion and exclusion criteria for participants. If        | 8, 9        |
| 19 | criteria                                                  |     | applicable, eligibility criteria for study centres and       |             |
| 20 |                                                           |     | individuals who will perform the interventions (eg,          |             |
| 21 |                                                           |     | surgeons, psychotherapists)                                  |             |
| 22 |                                                           |     |                                                              |             |
| 23 |                                                           |     |                                                              |             |
| 24 | Interventions                                             | 11a | Interventions for each group with sufficient detail to allow | 9           |
| 25 |                                                           |     | replication, including how and when they will be             |             |
| 26 |                                                           |     | administered                                                 |             |
| 27 |                                                           |     |                                                              |             |
| 28 |                                                           |     |                                                              |             |
| 29 |                                                           | 11b | Criteria for discontinuing or modifying allocated            | 13 and      |
| 30 |                                                           |     | interventions for a given trial participant (eg, drug dose   | supplement  |
| 31 |                                                           |     | change in response to harms, participant request, or         | 4,5, and 6  |
| 32 |                                                           |     | improving/worsening disease)                                 |             |
| 33 |                                                           |     |                                                              |             |
| 34 |                                                           | 11c | Strategies to improve adherence to intervention protocols,   | 12, 14, 15  |
| 35 |                                                           |     | and any procedures for monitoring adherence (eg, drug        |             |
| 36 |                                                           |     | tablet return, laboratory tests)                             |             |
| 37 |                                                           |     |                                                              |             |
| 38 |                                                           |     |                                                              |             |
| 39 |                                                           | 11d | Relevant concomitant care and interventions that are         | 9, 13       |
| 40 |                                                           |     | permitted or prohibited during the trial                     |             |
| 41 |                                                           |     |                                                              |             |
| 42 | Outcomes                                                  | 12  | Primary, secondary, and other outcomes, including the        | 8, 9        |
| 43 |                                                           |     | specific measurement variable (eg, systolic blood            |             |
| 44 |                                                           |     | pressure), analysis metric (eg, change from baseline, final  |             |
| 45 |                                                           |     | value, time to event), method of aggregation (eg, median,    |             |
| 46 |                                                           |     | proportion), and time point for each outcome. Explanation    |             |
| 47 |                                                           |     | of the clinical relevance of chosen efficacy and harm        |             |
| 48 |                                                           |     | outcomes is strongly recommended                             |             |
| 49 |                                                           |     |                                                              |             |
| 50 |                                                           |     |                                                              |             |
| 51 | Participant                                               | 13  | Time schedule of enrolment, interventions (including any     | Figure 2, 3 |
| 52 | timeline                                                  |     | run-ins and washouts), assessments, and visits for           |             |
| 53 |                                                           |     | participants. A schematic diagram is highly recommended      |             |
| 54 |                                                           |     | (see Figure)                                                 |             |
| 55 |                                                           |     |                                                              |             |
| 56 |                                                           |     |                                                              |             |
| 57 |                                                           |     |                                                              |             |
| 58 |                                                           |     |                                                              |             |
| 59 |                                                           |     |                                                              |             |
| 60 |                                                           |     |                                                              |             |

|   |             |    |                                                                                                                                                                                       |            |
|---|-------------|----|---------------------------------------------------------------------------------------------------------------------------------------------------------------------------------------|------------|
| 1 |             |    |                                                                                                                                                                                       |            |
| 2 | Sample size | 14 | Estimated number of participants needed to achieve study objectives and how it was determined, including clinical and statistical assumptions supporting any sample size calculations | 11         |
| 3 |             |    |                                                                                                                                                                                       |            |
| 4 |             |    |                                                                                                                                                                                       |            |
| 5 |             |    |                                                                                                                                                                                       |            |
| 6 |             |    |                                                                                                                                                                                       |            |
| 7 | Recruitment | 15 | Strategies for achieving adequate participant enrolment to reach target sample size                                                                                                   | 12, 14, 15 |
| 8 |             |    |                                                                                                                                                                                       |            |
| 9 |             |    |                                                                                                                                                                                       |            |

### Methods: Assignment of interventions (for controlled trials)

#### Allocation:

|    |                                  |     |                                                                                                                                                                                                                                                                                                                                                          |                     |
|----|----------------------------------|-----|----------------------------------------------------------------------------------------------------------------------------------------------------------------------------------------------------------------------------------------------------------------------------------------------------------------------------------------------------------|---------------------|
| 14 |                                  |     |                                                                                                                                                                                                                                                                                                                                                          |                     |
| 15 | Sequence generation              | 16a | Method of generating the allocation sequence (eg, computer-generated random numbers), and list of any factors for stratification. To reduce predictability of a random sequence, details of any planned restriction (eg, blocking) should be provided in a separate document that is unavailable to those who enrol participants or assign interventions | 10 and supplement 3 |
| 16 |                                  |     |                                                                                                                                                                                                                                                                                                                                                          |                     |
| 17 |                                  |     |                                                                                                                                                                                                                                                                                                                                                          |                     |
| 18 |                                  |     |                                                                                                                                                                                                                                                                                                                                                          |                     |
| 19 |                                  |     |                                                                                                                                                                                                                                                                                                                                                          |                     |
| 20 |                                  |     |                                                                                                                                                                                                                                                                                                                                                          |                     |
| 21 |                                  |     |                                                                                                                                                                                                                                                                                                                                                          |                     |
| 22 |                                  |     |                                                                                                                                                                                                                                                                                                                                                          |                     |
| 23 |                                  |     |                                                                                                                                                                                                                                                                                                                                                          |                     |
| 24 | Allocation concealment mechanism | 16b | Mechanism of implementing the allocation sequence (eg, central telephone; sequentially numbered, opaque, sealed envelopes), describing any steps to conceal the sequence until interventions are assigned                                                                                                                                                | 10 and supplement 3 |
| 25 |                                  |     |                                                                                                                                                                                                                                                                                                                                                          |                     |
| 26 |                                  |     |                                                                                                                                                                                                                                                                                                                                                          |                     |
| 27 |                                  |     |                                                                                                                                                                                                                                                                                                                                                          |                     |
| 28 |                                  |     |                                                                                                                                                                                                                                                                                                                                                          |                     |
| 29 |                                  |     |                                                                                                                                                                                                                                                                                                                                                          |                     |
| 30 |                                  |     |                                                                                                                                                                                                                                                                                                                                                          |                     |
| 31 | Implementation                   | 16c | Who will generate the allocation sequence, who will enrol participants, and who will assign participants to interventions                                                                                                                                                                                                                                | 10 and supplement 3 |
| 32 |                                  |     |                                                                                                                                                                                                                                                                                                                                                          |                     |
| 33 |                                  |     |                                                                                                                                                                                                                                                                                                                                                          |                     |
| 34 |                                  |     |                                                                                                                                                                                                                                                                                                                                                          |                     |
| 35 | Blinding (masking)               | 17a | Who will be blinded after assignment to interventions (eg, trial participants, care providers, outcome assessors, data analysts), and how                                                                                                                                                                                                                | 7 and supplement 3  |
| 36 |                                  |     |                                                                                                                                                                                                                                                                                                                                                          |                     |
| 37 |                                  |     |                                                                                                                                                                                                                                                                                                                                                          |                     |
| 38 |                                  |     |                                                                                                                                                                                                                                                                                                                                                          |                     |
| 39 |                                  |     |                                                                                                                                                                                                                                                                                                                                                          |                     |
| 40 |                                  | 17b | If blinded, circumstances under which unblinding is permissible, and procedure for revealing a participant's allocated intervention during the trial                                                                                                                                                                                                     | 12                  |
| 41 |                                  |     |                                                                                                                                                                                                                                                                                                                                                          |                     |
| 42 |                                  |     |                                                                                                                                                                                                                                                                                                                                                          |                     |
| 43 |                                  |     |                                                                                                                                                                                                                                                                                                                                                          |                     |

### Methods: Data collection, management, and analysis

|    |                         |     |                                                                                                                                                                                                                                                                                                                                                                                                              |        |
|----|-------------------------|-----|--------------------------------------------------------------------------------------------------------------------------------------------------------------------------------------------------------------------------------------------------------------------------------------------------------------------------------------------------------------------------------------------------------------|--------|
| 44 |                         |     |                                                                                                                                                                                                                                                                                                                                                                                                              |        |
| 45 |                         |     |                                                                                                                                                                                                                                                                                                                                                                                                              |        |
| 46 | Data collection methods | 18a | Plans for assessment and collection of outcome, baseline, and other trial data, including any related processes to promote data quality (eg, duplicate measurements, training of assessors) and a description of study instruments (eg, questionnaires, laboratory tests) along with their reliability and validity, if known. Reference to where data collection forms can be found, if not in the protocol | 11, 12 |
| 47 |                         |     |                                                                                                                                                                                                                                                                                                                                                                                                              |        |
| 48 |                         |     |                                                                                                                                                                                                                                                                                                                                                                                                              |        |
| 49 |                         |     |                                                                                                                                                                                                                                                                                                                                                                                                              |        |
| 50 |                         |     |                                                                                                                                                                                                                                                                                                                                                                                                              |        |
| 51 |                         |     |                                                                                                                                                                                                                                                                                                                                                                                                              |        |
| 52 |                         |     |                                                                                                                                                                                                                                                                                                                                                                                                              |        |
| 53 |                         |     |                                                                                                                                                                                                                                                                                                                                                                                                              |        |
| 54 |                         |     |                                                                                                                                                                                                                                                                                                                                                                                                              |        |
| 55 |                         |     |                                                                                                                                                                                                                                                                                                                                                                                                              |        |
| 56 |                         |     |                                                                                                                                                                                                                                                                                                                                                                                                              |        |
| 57 |                         |     |                                                                                                                                                                                                                                                                                                                                                                                                              |        |
| 58 |                         |     |                                                                                                                                                                                                                                                                                                                                                                                                              |        |
| 59 |                         |     |                                                                                                                                                                                                                                                                                                                                                                                                              |        |
| 60 |                         |     |                                                                                                                                                                                                                                                                                                                                                                                                              |        |

|    |                                 |     |                                                                |
|----|---------------------------------|-----|----------------------------------------------------------------|
| 1  |                                 |     |                                                                |
| 2  |                                 | 18b | Plans to promote participant retention and complete            |
| 3  |                                 |     | follow-up, including list of any outcome data to be            |
| 4  |                                 |     | collected for participants who discontinue or deviate from     |
| 5  |                                 |     | intervention protocols                                         |
| 6  |                                 |     |                                                                |
| 7  | Data                            | 19  | Plans for data entry, coding, security, and storage,           |
| 8  | management                      |     | including any related processes to promote data quality        |
| 9  |                                 |     | (eg, double data entry; range checks for data values).         |
| 10 |                                 |     | Reference to where details of data management                  |
| 11 |                                 |     | procedures can be found, if not in the protocol                |
| 12 |                                 |     |                                                                |
| 13 |                                 |     |                                                                |
| 14 | Statistical                     | 20a | Statistical methods for analysing primary and secondary        |
| 15 | methods                         |     | outcomes. Reference to where other details of the              |
| 16 |                                 |     | statistical analysis plan can be found, if not in the protocol |
| 17 |                                 |     |                                                                |
| 18 |                                 |     |                                                                |
| 19 |                                 | 20b | Methods for any additional analyses (eg, subgroup and          |
| 20 |                                 |     | adjusted analyses)                                             |
| 21 |                                 |     |                                                                |
| 22 |                                 | 20c | Definition of analysis population relating to protocol non-    |
| 23 |                                 |     | adherence (eg, as randomised analysis), and any                |
| 24 |                                 |     | statistical methods to handle missing data (eg, multiple       |
| 25 |                                 |     | imputation)                                                    |
| 26 |                                 |     |                                                                |
| 27 |                                 |     |                                                                |
| 28 | <b>Methods: Monitoring</b>      |     |                                                                |
| 29 |                                 |     |                                                                |
| 30 | Data                            | 21a | Composition of data monitoring committee (DMC);                |
| 31 | monitoring                      |     | summary of its role and reporting structure; statement of      |
| 32 |                                 |     | whether it is independent from the sponsor and competing       |
| 33 |                                 |     | interests; and reference to where further details about its    |
| 34 |                                 |     | charter can be found, if not in the protocol. Alternatively,   |
| 35 |                                 |     | an explanation of why a DMC is not needed                      |
| 36 |                                 |     |                                                                |
| 37 |                                 |     |                                                                |
| 38 |                                 | 21b | Description of any interim analyses and stopping               |
| 39 |                                 |     | guidelines, including who will have access to these interim    |
| 40 |                                 |     | results and make the final decision to terminate the trial     |
| 41 |                                 |     |                                                                |
| 42 | Harms                           | 22  | Plans for collecting, assessing, reporting, and managing       |
| 43 |                                 |     | solicited and spontaneously reported adverse events and        |
| 44 |                                 |     | other unintended effects of trial interventions or trial       |
| 45 |                                 |     | conduct                                                        |
| 46 |                                 |     |                                                                |
| 47 |                                 |     |                                                                |
| 48 | Auditing                        | 23  | Frequency and procedures for auditing trial conduct, if        |
| 49 |                                 |     | any, and whether the process will be independent from          |
| 50 |                                 |     | investigators and the sponsor                                  |
| 51 |                                 |     |                                                                |
| 52 |                                 |     |                                                                |
| 53 | <b>Ethics and dissemination</b> |     |                                                                |
| 54 |                                 |     |                                                                |
| 55 | Research                        | 24  | Plans for seeking research ethics committee/institutional      |
| 56 | ethics                          |     | review board (REC/IRB) approval                                |
| 57 | approval                        |     |                                                                |
| 58 |                                 |     |                                                                |
| 59 |                                 |     |                                                                |
| 60 |                                 |     |                                                                |

|    |                               |     |                                                                                                                                                                                                                                                                                     |                    |
|----|-------------------------------|-----|-------------------------------------------------------------------------------------------------------------------------------------------------------------------------------------------------------------------------------------------------------------------------------------|--------------------|
| 1  |                               |     |                                                                                                                                                                                                                                                                                     |                    |
| 2  | Protocol amendments           | 25  | Plans for communicating important protocol modifications (eg, changes to eligibility criteria, outcomes, analyses) to relevant parties (eg, investigators, REC/IRBs, trial participants, trial registries, journals, regulators)                                                    | N/A                |
| 3  |                               |     |                                                                                                                                                                                                                                                                                     |                    |
| 4  |                               |     |                                                                                                                                                                                                                                                                                     |                    |
| 5  |                               |     |                                                                                                                                                                                                                                                                                     |                    |
| 6  |                               |     |                                                                                                                                                                                                                                                                                     |                    |
| 7  | Consent or assent             | 26a | Who will obtain informed consent or assent from potential trial participants or authorised surrogates, and how (see Item 32)                                                                                                                                                        | 14, 15             |
| 8  |                               |     |                                                                                                                                                                                                                                                                                     |                    |
| 9  |                               |     |                                                                                                                                                                                                                                                                                     |                    |
| 10 |                               |     |                                                                                                                                                                                                                                                                                     |                    |
| 11 |                               |     |                                                                                                                                                                                                                                                                                     |                    |
| 12 |                               | 26b | Additional consent provisions for collection and use of participant data and biological specimens in ancillary studies, if applicable                                                                                                                                               | N/A                |
| 13 |                               |     |                                                                                                                                                                                                                                                                                     |                    |
| 14 |                               |     |                                                                                                                                                                                                                                                                                     |                    |
| 15 |                               |     |                                                                                                                                                                                                                                                                                     |                    |
| 16 | Confidentiality               | 27  | How personal information about potential and enrolled participants will be collected, shared, and maintained in order to protect confidentiality before, during, and after the trial                                                                                                | 11                 |
| 17 |                               |     |                                                                                                                                                                                                                                                                                     |                    |
| 18 |                               |     |                                                                                                                                                                                                                                                                                     |                    |
| 19 |                               |     |                                                                                                                                                                                                                                                                                     |                    |
| 20 |                               |     |                                                                                                                                                                                                                                                                                     |                    |
| 21 |                               |     |                                                                                                                                                                                                                                                                                     |                    |
| 22 | Declaration of interests      | 28  | Financial and other competing interests for principal investigators for the overall trial and each study site                                                                                                                                                                       | Title page         |
| 23 |                               |     |                                                                                                                                                                                                                                                                                     |                    |
| 24 |                               |     |                                                                                                                                                                                                                                                                                     |                    |
| 25 | Access to data                | 29  | Statement of who will have access to the final trial dataset, and disclosure of contractual agreements that limit such access for investigators                                                                                                                                     | 11,12              |
| 26 |                               |     |                                                                                                                                                                                                                                                                                     |                    |
| 27 |                               |     |                                                                                                                                                                                                                                                                                     |                    |
| 28 |                               |     |                                                                                                                                                                                                                                                                                     |                    |
| 29 |                               |     |                                                                                                                                                                                                                                                                                     |                    |
| 30 | Ancillary and post-trial care | 30  | Provisions, if any, for ancillary and post-trial care, and for compensation to those who suffer harm from trial participation                                                                                                                                                       | 14                 |
| 31 |                               |     |                                                                                                                                                                                                                                                                                     |                    |
| 32 |                               |     |                                                                                                                                                                                                                                                                                     |                    |
| 33 |                               |     |                                                                                                                                                                                                                                                                                     |                    |
| 34 | Dissemination policy          | 31a | Plans for investigators and sponsor to communicate trial results to participants, healthcare professionals, the public, and other relevant groups (eg, via publication, reporting in results databases, or other data sharing arrangements), including any publication restrictions | Via Publication    |
| 35 |                               |     |                                                                                                                                                                                                                                                                                     |                    |
| 36 |                               |     |                                                                                                                                                                                                                                                                                     |                    |
| 37 |                               |     |                                                                                                                                                                                                                                                                                     |                    |
| 38 |                               |     |                                                                                                                                                                                                                                                                                     |                    |
| 39 |                               |     |                                                                                                                                                                                                                                                                                     |                    |
| 40 |                               |     |                                                                                                                                                                                                                                                                                     |                    |
| 41 |                               | 31b | Authorship eligibility guidelines and any intended use of professional writers                                                                                                                                                                                                      | ICMJE              |
| 42 |                               |     |                                                                                                                                                                                                                                                                                     |                    |
| 43 |                               |     |                                                                                                                                                                                                                                                                                     |                    |
| 44 |                               | 31c | Plans, if any, for granting public access to the full protocol, participant-level dataset, and statistical code                                                                                                                                                                     | N/A                |
| 45 |                               |     |                                                                                                                                                                                                                                                                                     |                    |
| 46 |                               |     |                                                                                                                                                                                                                                                                                     |                    |
| 47 |                               |     |                                                                                                                                                                                                                                                                                     |                    |
| 48 | <b>Appendices</b>             |     |                                                                                                                                                                                                                                                                                     |                    |
| 49 |                               |     |                                                                                                                                                                                                                                                                                     |                    |
| 50 | Informed consent materials    | 32  | Model consent form and other related documentation given to participants and authorised surrogates                                                                                                                                                                                  | Available in Farsi |
| 51 |                               |     |                                                                                                                                                                                                                                                                                     |                    |
| 52 |                               |     |                                                                                                                                                                                                                                                                                     |                    |
| 53 |                               |     |                                                                                                                                                                                                                                                                                     |                    |
| 54 | Biological specimens          | 33  | Plans for collection, laboratory evaluation, and storage of biological specimens for genetic or molecular analysis in the current trial and for future use in ancillary studies, if applicable                                                                                      | N/A                |
| 55 |                               |     |                                                                                                                                                                                                                                                                                     |                    |
| 56 |                               |     |                                                                                                                                                                                                                                                                                     |                    |
| 57 |                               |     |                                                                                                                                                                                                                                                                                     |                    |
| 58 |                               |     |                                                                                                                                                                                                                                                                                     |                    |
| 59 |                               |     |                                                                                                                                                                                                                                                                                     |                    |
| 60 |                               |     |                                                                                                                                                                                                                                                                                     |                    |

1 \*It is strongly recommended that this checklist be read in conjunction with the SPIRIT 2013  
2 Explanation & Elaboration for important clarification on the items. Amendments to the  
3 protocol should be tracked and dated. The SPIRIT checklist is copyrighted by the SPIRIT  
4 Group under the Creative Commons "[Attribution-NonCommercial-NoDerivs 3.0 Unported](#)"  
5 license.  
6  
7  
8  
9  
10  
11  
12  
13  
14  
15  
16  
17  
18  
19  
20  
21  
22  
23  
24  
25  
26  
27  
28  
29  
30  
31  
32  
33  
34  
35  
36  
37  
38  
39  
40  
41  
42  
43  
44  
45  
46  
47  
48  
49  
50  
51  
52  
53  
54  
55  
56  
57  
58  
59  
60

For peer review only

# BMJ Open

## Aneurysmal subarachnoid hemorrhage- cerebral vasospasm and prophylactic Ibuprofen: A randomised controlled pilot trial protocol

|                                 |                                                                                                                                                                                                                                                                                                                                                                                                                                                                                                                                                                                                                                                                                                         |
|---------------------------------|---------------------------------------------------------------------------------------------------------------------------------------------------------------------------------------------------------------------------------------------------------------------------------------------------------------------------------------------------------------------------------------------------------------------------------------------------------------------------------------------------------------------------------------------------------------------------------------------------------------------------------------------------------------------------------------------------------|
| Journal:                        | <i>BMJ Open</i>                                                                                                                                                                                                                                                                                                                                                                                                                                                                                                                                                                                                                                                                                         |
| Manuscript ID                   | bmjopen-2021-058895.R1                                                                                                                                                                                                                                                                                                                                                                                                                                                                                                                                                                                                                                                                                  |
| Article Type:                   | Protocol                                                                                                                                                                                                                                                                                                                                                                                                                                                                                                                                                                                                                                                                                                |
| Date Submitted by the Author:   | 16-Feb-2022                                                                                                                                                                                                                                                                                                                                                                                                                                                                                                                                                                                                                                                                                             |
| Complete List of Authors:       | Dayyani, Mojtaba; City of Hope National Medical Center, Neurosurgery<br>Mousavi Mohammadi , Ermia ; Mashhad University of Medical Sciences<br>Ghaem Hospital, Neurosurgery<br>Ashoorion, Vahid; McMaster University Department of Health Research<br>Methods Evidence and Impact<br>Sadeghirad, Behnam; McMaster University Department of Health<br>Research Methods Evidence and Impact<br>Javedani Yekta , Mohammadreza ; Mashhad University of Medical<br>Sciences Ghaem Hospital<br>Grotta, James; Memorial Hermann Texas Medical Center<br>Gonzalez, Nestor; Cedars-Sinai Medical Center, Neurosurgery<br>Zabihyan, Samira; Mashhad University of Medical Sciences Ghaem<br>Hospital, Neurosurgery |
| <b>Primary Subject Heading</b>: | Neurology                                                                                                                                                                                                                                                                                                                                                                                                                                                                                                                                                                                                                                                                                               |
| Secondary Subject Heading:      | Intensive care, Research methods                                                                                                                                                                                                                                                                                                                                                                                                                                                                                                                                                                                                                                                                        |
| Keywords:                       | Stroke < NEUROLOGY, NEUROSURGERY, Clinical trials < THERAPEUTICS                                                                                                                                                                                                                                                                                                                                                                                                                                                                                                                                                                                                                                        |
|                                 |                                                                                                                                                                                                                                                                                                                                                                                                                                                                                                                                                                                                                                                                                                         |

SCHOLARONE™  
Manuscripts



1  
2  
3 1 **Aneurysmal subarachnoid hemorrhage- cerebral vasospasm and prophylactic Ibuprofen:**  
4  
5 2 **A randomised controlled pilot trial protocol**  
6  
7  
8  
9 3

10  
11 4 Mojtaba Dayyani (MD)<sup>1,2</sup>, Ermia Mousavi Mohammadi (MD)<sup>2</sup>, Vahid Ashoorion (MD, PhD)<sup>3</sup>,  
12  
13 5 Behnam Sadeghirad (PharmD, MPH, PhD)<sup>3</sup>, Mohammadreza javedani yekta (MD)<sup>2</sup>, James  
14  
15 6 Grotta (MD)<sup>4</sup>, Nestor Gonzalez (MD)<sup>5</sup>, Samira Zabihyan (MD)<sup>2,\*</sup>  
16  
17

18 7 1. Division of Neurosurgery, City of Hope Beckman Research Institute and Medical Center,  
19 8 Duarte, California, United States

20 9 2. Department of Neurosurgery, Ghaem Teaching Hospital, Faculty of medicine, Mashhad  
21 10 University of Medical Sciences, Mashhad, Iran.

22 11 3. Department of Health Research Methods, Evidence, and Impact, McMaster University,  
23 12 Hamilton, Ontario, Canada.

24 13 4. Stroke Research and Mobile Stroke Unit, Memorial Hermann Hospital-Texas Medical Center,  
25 14 Houston, Texas, United States.

26 15 5. Department of Neurosurgery, Cedars Sinai Medical Center, Los Angeles, California.

27  
28  
29  
30 16 **\*Corresponding author: Dr. Samira Zabihyan**

31  
32  
33 17 Email: zabihyan@yahoo.com/ zabihyans@mums.ac.ir

34 18 Tel: +989151115783

35 19 Fax: +985138411797

36 20 Postal Address: Department of Neurosurgery, Ghaem Teaching hospital, Parastar street, Ahmad  
37 21 Abad Blvd, Mashhad, Razavi-khorasan province, Iran.

38 22 Zip/postal code: 9176691999  
39  
40

41 24 **Running head:** Prophylactic effects of Ibuprofen on cerebral vasospasm after aSAH

42  
43 25 **Text word count: 2946**

44  
45 26 **Abstract word count: 266**

46  
47 27 Number of figures: 3

48  
49 28 Number of tables: 0

50  
51 29 Appendix: 8 pages

52  
53 30 **Trial registration:** ISRCTN14611625  
54  
55  
56  
57  
58  
59  
60

## 31 List of Abbreviations

| 32 | Abbreviation | Explanation                                                      |
|----|--------------|------------------------------------------------------------------|
| 33 | aSAH         | aneurysmal Subarachnoid Hemorrhage                               |
| 34 | CI           | Confidence Interval                                              |
| 35 | COX          | Cyclooxygenase                                                   |
| 36 | CSF          | Cerebrospinal Fluid                                              |
| 37 | CTA          | CT Angiography                                                   |
| 38 | CVS          | Cerebral Vasospasm                                               |
| 39 | DSA          | Digital Subtraction Angiography                                  |
| 40 | ICAM-1       | Intercellular adhesion molecule-1                                |
| 41 | ICU          | Intensive care unit                                              |
| 42 | TCD          | Transcranial Doppler                                             |
| 43 | MRA          | Magnetic Resonance Imaging                                       |
| 44 | mRS          | modified Rankin Scale                                            |
| 45 | NIHSS        | National Institutes of Health Stroke Scale                       |
| 46 | NSAIDs       | Non-steroidal anti-inflammatory drugs                            |
| 47 | PSVMCA       | Peak Systolic Middle Cerebral Artery Velocity                    |
| 48 | SIRS         | Systemic Inflammatory Response Syndrome                          |
| 49 | SPIRIT       | Standard Protocol Items Recommendation for Interventional Trials |
| 50 | TXA          | Thromboxane                                                      |
| 51 | VCAM-1       | Vascular Cell Adhesion Molecule-1                                |
| 52 | WFNS         | World Federation of Neurological Surgeons                        |

1  
2  
3 **57 Abstract**  
4

5 **58 Introduction:** Cerebral vasospasm (CVS) is the leading cause of mortality and morbidity  
6  
7  
8 **59** following aSAH. One of the recently implicated underlying mechanisms of CVS is  
9  
10 **60** inflammatory cascades. Specific feasibility objectives include determining the ability to recruit  
11  
12 **61** 30 participants over twelve months while at least 75% of them comply with at least 75% of the  
13  
14 **62** study protocol and being able to follow 85% of them for three months after discharge.  
15

16  
17 **63 Methods and analysis:** This is a feasibility study for a randomised, controlled trial. Eligible  
18  
19 **64** participants are adult patients 18y/o and older with an aSAH confirmed by a brain CT scan, and  
20  
21 **65** CT angiography, or magnetic resonance angiography, or digital subtraction angiography who  
22  
23 **66** admitted to the emergency department within 12 hours of the ictus. Eligible subjects will be  
24  
25 **67** randomised 1:1 for the administration of either ibuprofen or a placebo, while both groups will  
26  
27 **68** concomitantly be treated by the standard of care for two weeks. Care givers, patients, outcome  
28  
29 **69** assessors and data analysts will be blinded. This will be the first study to investigate the preventive  
30  
31 **70** effects of a short acting NSAID on CVS and the key expected outcome of this pilot study is the  
32  
33 **71** feasibility and safety assessment of the administration of Ibuprofen in patients with aSAH. The  
34  
35 **72** objectives of the definitive trial would be to assess the effect of Ibuprofen relative to placebo on  
36  
37 **73** mortality, CVS, DCI, and level of disability at 3-month follow-up.  
38  
39  
40  
41

42 **74 Ethics and dissemination:** This study is approved by Mashhad University of Medical Sciences  
43  
44 **75** ethical committee (IR.MUMS.MEDICAL.REC.1398.225). Results from the study will be  
45  
46 **76** submitted for publication regardless of whether or not there are significant findings.  
47  
48

49 **77 Trial registration:** ISRCTN14611625  
50

51  
52 **78** Keywords: Aneurysmal subarachnoid hemorrhage, Cerebral vasospasm, Delayed cerebral  
53  
54 **79** ischemia, Feasibility study, Ibuprofen, Randomised Controlled Trial.  
55  
56  
57  
58  
59  
60

## 80 **Strengths and limitations of this study**

- 81 • Rigorous trial protocol to evaluate the feasibility and safety of conducting a larger phase  
82 III trial to assess the preventive role of Ibuprofen on cerebral vasospasm secondary to  
83 aneurysmal Subarachnoid Hemorrhage (aSAH).
- 84 • Based on this feasibility pilot trial, four critical outcomes will be evaluated in the  
85 definitive trial including mortality, cerebral vasospasm, DCI, and level of disability at 3-  
86 month follow-up.
- 87 • Recruitment of eligible participants in a narrow time window (12-hour) after the  
88 occurrence of aSAH is a challenging inclusion criteria that may slows down the  
89 advancement of the trial.
- 90 • To minimize any potential bias, blinding of health care providers (physicians, ICU  
91 nurses, residents), patients, outcome assessors, and data analysts to treatment allocation is  
92 being undertaken.
- 93 • Example of a low cost trial due to using a repurposed FDA approved and affordable  
94 agent as prophylactic therapy.

54 100

## 101 INTRODUCTION

### 102 *Background and Rationale*

103 Aneurysmal subarachnoid hemorrhage (aSAH) accounts for 5–10 % of all strokes worldwide,  
104 which approximately equals to a total of 600,000 new cases per year <sup>1</sup>. Up to 44% of such cases  
105 will die <sup>2</sup>, and almost 20% of the survived ones would become disabled and dependent <sup>2</sup>.  
106 Cerebral vasospasm following aSAH is the leading cause of mortality and morbidity <sup>3-5</sup>.  
107 The exact mechanisms of the complex inflammatory cascade leading to cerebral vasospasm is  
108 not well understood, and usual treatments have no sufficient therapeutic effects <sup>6-9</sup>. However,  
109 several studies support the hypothesis that local and systemic inflammatory responses may  
110 participate in the process of cerebral vasospasm and its consequent poor outcomes. Increased  
111 plasma and cerebrospinal fluid (CSF) level of inflammatory markers, like TNF- $\alpha$ , and various  
112 interleukins during SAH is seen, and this increment is correlated with poor neurological outcome  
113 <sup>10-12</sup>. Moreover, the systemic inflammatory response syndrome (SIRS) is associated with poor  
114 outcomes after SAH and is presented in up to 63 % of patients after SAH <sup>13 14</sup>. This becomes an  
115 impetus to evaluate the possible effectiveness of anti-inflammatory medications after SAH.  
116 Ibuprofen is one of the NSAIDs which inhibit COX enzymes in a non-specific manner. In  
117 addition to decreasing the level of cytokines and prostaglandins, this drug also prevents the  
118 expression of two specific cell adhesion molecules, intercellular adhesion molecule-1 (ICAM-1)  
119 and vascular cell adhesion molecule-1 (VCAM-1) that belongs to the immunoglobulin  
120 superfamily. The immunoglobulin superfamily proteins are up-regulated in patients who develop  
121 clinical vasospasm <sup>11</sup>. Leukocyte integrins bind to these proteins on endothelial cells. The  
122 immunoglobulin superfamily proteins are necessary for leukocyte-endothelial cell adhesion and  
123 leukocyte migration <sup>15-17</sup> (Figure 1, **Supplemental digital content, part 1**).

1  
2  
3 124 Ibuprofen prevents inflammatory reactions caused by leukocytes with disrupting the process of  
4  
5 125 migration.  
6  
7  
8 126 Ibuprofen's efficacy on cerebral vasospasm has been proven in an intracranial model of rabbits  
9  
10 127 when its intracranial administration initiated within 6 hours after SAH, but no effect was  
11  
12 128 observed when treatment is begun later than 12 hours<sup>18</sup>. As the acute phase of inflammation  
13  
14 129 starts 3-4 hours after the SAH<sup>11</sup>, and ibuprofen is a fast acting NSAID; it could prevent from  
15  
16 130 binding of macrophages and neutrophils to the endothelial cells and entering the subarachnoid  
17  
18 131 space; hence, reducing the intensity of acute phase inflammation. This inhibitory action, will  
19  
20 132 decrease the number of trapped leukocytes dying and degranulating in the subarachnoid space in  
21  
22 133 the next 2 to 4 days<sup>11</sup>, and subsequently may reduce or prevent chronic vasospasm in the  
23  
24 134 upcoming days of admission. Thus, the early administration of ibuprofen considered in this study  
25  
26 135 might be a key to shut off the inflammatory cascade at the initial step (Figure 1). Furthermore, in  
27  
28 136 terms of side effects, the potential of NSAIDs to induce hemorrhagic stroke has been heavily  
29  
30 137 dismissed by self-reports, prescriptions databases, and large multicentered studies<sup>19</sup>.  
31  
32  
33  
34  
35  
36 138 To date, we have found four clinical trials evaluating the efficacy of NSAIDs on vasospasm after  
37  
38 139 aSAH, three of which were focused on the anti-platelet mechanism of aspirin <sup>20-22</sup>. The fourth  
39  
40 140 study was a placebo-controlled trial that assessed the preventive effects of meloxicam during  
41  
42 141 seven days after aSAH <sup>23</sup>. However, no clinical data are available regarding the efficacy of a fast  
43  
44 142 acting oral NSAID for the administration in a narrow time interval after the occurrence of aSAH.  
45  
46 143 In the current study, we sought to investigate the preventive role of ibuprofen on the vasospasm  
47  
48 144 secondary to aSAH and its outcomes.  
49  
50  
51  
52  
53  
54  
55  
56  
57  
58  
59  
60

1  
2  
3 145 ***Objectives***  
4

5 146 The objective of the current pilot trial is to establish the feasibility of a larger trial by  
6  
7 147 successfully recruiting 30 participants over a 12-month period and demonstrating adherence to  
8  
9 148 our study protocol. Additionally, we will identify possible adverse events related to the  
10  
11 149 administration of ibuprofen and determine whether its administration is superior to the standard  
12  
13 150 treatment in terms of the prevention of cerebral vasospasm secondary to aSAH and its clinical  
14  
15 151 outcomes.  
16  
17  
18

19 152 ***Trial design***  
20

21 153 This pilot trial is a single center, parallel randomized 1:1, controlled, clinical trial. Health care  
22  
23 154 providers (physicians, ICU nurses, residents), patients, outcome assessors, and data analysts will  
24  
25 155 be blinded to treatment allocation. We followed standard protocol items recommendation for  
26  
27 156 interventional trials (SPIRIT) checklist to conduct this pilot clinical trial protocol<sup>24</sup>.  
28  
29  
30

31 157  
32

33 158  
34

35 159  
36

37 160  
38

39 161  
40

41 162  
42

43 163  
44

45 164  
46

47 165  
48

49 166  
50

51 167  
52  
53  
54  
55  
56  
57  
58  
59  
60

## 168 **METHODS**

### 169 **Subjects**

#### 170 *Inclusion criteria*

- 171 1. Adult patients 18y/o and older with an aneurysmal subarachnoid hemorrhage confirmed  
172 by a brain CT scan, and CT angiography, or magnetic resonance angiography, or digital  
173 subtraction angiography (Figure 2).
- 174 2. Admitted to the emergency department within 12 hours of the ictus.
- 175 3. Patients must have a World Federation of Neurological Surgeons (WFNS) score of I, II, or  
176 III at the initial examination.

#### 177 *Exclusion criteria*

- 178 1. Patients who have hypersensitivity to aspirin, ibuprofen, or other NSAIDs,
- 179 2. Previous and prolonged use of any type of NSAIDs,
- 180 3. History of aneurysmal re-bleeding, and active bleeding of a gastrointestinal ulcer,  
181 hemodynamic instability, pregnancy, and current consumption of antiplatelet agents such  
182 as clopidogrel and aspirin.
- 183 4. Patients with history of myocardial infarction (MI) or percutaneous coronary interventions.

### 184 **Outcome measures and follow-up**

185 The goal of the current pilot trial is to establish the feasibility of a larger trial by successfully  
186 recruiting 30 participants over a 12-month period and demonstrating adherence to our study  
187 protocol. Based on the effect estimates coming out of this pilot study, we will calculate a proper  
188 sample size for the definitive trial. Specific feasibility objectives include determining:

- 189 1. Our ability to recruit 30 participants over twelve months
- 190 2. Our ability to follow 85% of participants for three months



- 1  
2  
3 191 3. Whether at least 75% of participants comply with at least 75% of the study protocol  
4  
5

6 192 **Objectives for the Definitive Trial**  
7

8 193 The primary research objective is:

9  
10 194 To determine the effects of Ibuprofen versus placebo on the rate of all-cause mortality  
11  
12

13 195 The secondary research objectives are:

- 14  
15 196 1. To assess whether the administration of ibuprofen in patients with aSAH, could prevent  
16  
17 197 the occurrence of cerebral vasospasm versus placebo.  
18  
19 198 2. To determine the effects of Ibuprofen versus placebo on the occurrence of delayed  
20  
21 199 cerebral ischemia.  
22  
23 200 3. To elucidate the effects of Ibuprofen versus placebo on the level of disability based on  
24  
25 201 modified Rankin Scale (mRS) at three-month follow-up.  
26  
27  
28  
29

30 202 **Study description**  
31

32 203 The patients will be hospitalized for at least 14 days because the maximum inflammation in the  
33  
34 204 subarachnoid space occurs between days 9 to 14. Based on our institutional protocol for the  
35  
36 205 management of SAH, nimodipine 60 mg every 4 hours for 21 days, appropriate fluid therapy,  
37  
38 206 and phenytoin will be administered for all patients, and microsurgical aneurysmal clipping in  
39  
40 207 patients presenting with large (>50mL) intraparenchymal hematomas and middle cerebral artery  
41  
42 208 aneurysms, or interventional coiling will be performed for elderly (>70 years of age) patients, in  
43  
44 209 those presenting with poor-grade aSAH, and in those with aneurysms of the basilar apex<sup>25</sup>.  
45  
46 210 In the Ibuprofen arm, eligible patients (**Supplemental digital content, part 2**) will receive  
47  
48 211 Ibuprofen capsules 400mg/every 6 hours for 14 days, added to standard treatment (Figure 3).  
49  
50 212 Manufactured ibuprofen capsules will be administered orally in the intervention group. This  
51  
52 213 dosage is an anti-inflammatory dose of ibuprofen and placed in the middle of the therapeutic  
53  
54  
55  
56  
57  
58  
59  
60

1  
2  
3 214 window of this drug. In the control group, placebo capsules that are manufactured identical to the  
4  
5 215 ibuprofen capsules in terms of color, size, and shape; will be ordered in the same way as the  
6  
7 216 intervention group. In subjects who are lethargic or have impaired consciousness, medication and  
8  
9 217 placebo will be administered through enteral tube. The criteria for the evaluation of vasospasm  
10  
11 218 and the scales used for assessing disability are discussed in **Supplemental digital content, part**  
12  
13  
14 219 **3.**

### 220 **Randomization and Allocation**

20 221 To protect the blinding and integrity of the study (**Supplemental digital content, part 4**), a  
21  
22 222 statistician who is not affiliated to the research team develops the randomization plan. The  
23  
24 223 statistician will generate a permuted block randomization table using an online random sequence  
25  
26 224 generator with an allocation list in random order. The allocation ratio is 1:1. An independent  
27  
28 225 investigator allocates participants into two groups. The allocator uses an online computer-based  
29  
30 226 randomization program (<http://www.randomization.com>) to randomize permutation<sup>26</sup>. In the  
31  
32 227 first step, the statistician uses Randomization.com's pseudo-random number generator of  
33  
34 228 Wichmann and Hill (1982) as modified by McLeod to specify a treatment (A or B) to each  
35  
36 229 participant file numbered 1 to 30. In the second step, an independent investigator will provide a  
37  
38 230 random permutation of all of the integers from the smallest to the largest by the program. The  
39  
40 231 independent investigator gives a file to each participant by the order provided in the previous  
41  
42 232 step. The allocator will pick up a covered, sealed envelope from a box in which sequentially  
43  
44 233 numbered envelopes are shuffled. Patients will receive drug A or B according to the method of  
45  
46 234 allocation mentioned above.  
47  
48  
49  
50  
51  
52  
53  
54  
55  
56  
57  
58  
59  
60

### 235 **Sample size**

236 Our sample size is based on the confidence interval around the proportion of complete follow-up.  
237 We will consider the pilot successful if we achieved at least 85% follow-up at three months for  
238 our primary trial outcomes. If 29/30 participants achieve successful follow-up, the lower  
239 boundary of the 95% confidence interval will be above 85%, and we will consider the trial  
240 feasible. If less than 22/30 achieve complete follow-up, the upper boundary of the confidence  
241 interval will be below 85%, and we will consider the trial unfeasible. Therefore, if between 22  
242 and 29 out of 30 patients complete a 3-month follow-up, the feasibility of the trial will remain  
243 uncertain; however, we will consider this satisfactory.

### 244 **Data Management and Statistical Analysis**

245 The analysis and reporting of results will follow the CONSORT guidelines for reporting of  
246 randomised pilot and feasibility trials<sup>27</sup>. Data will be collected on forms and archived in a  
247 password-protected encrypted electronic database. All recruited and randomized patients will be  
248 included in the analysis. Data analysis will be performed by a blinded investigator with treatment  
249 groups coded as A and B. All data collected will be summarised for reporting purposes using  
250 descriptive statistics.

### 251 **Feasibility analysis (Primary)**

252 Data will be collected on forms and archived in a password-protected encrypted electronic  
253 database. Point estimates of recruitment and feasibility events, including adherence to protocol  
254 and follow-up rate at three months, will be presented as proportions with 95% CIs. The pilot  
255 study results will be evaluated to identify recruitment issues, data management issues, and  
256 inform anticipated follow-up rates.

### 257 **Efficacy Analysis for Definitive Study (Secondary)**

258 We plan to include the data from our pilot in the definitive trial if we can demonstrate feasibility,  
259 assuming no important changes to our patient population, intervention, or outcome measures. All  
260 patients enrolled in the trial and randomised will be included in the analysis, regardless of the  
261 level of adherence to the intervention or any other deviation from the protocol. Due to the low  
262 power of the pilot study, we will report the descriptive results for all efficacy- and harm-related  
263 outcomes. We will not complete any subgroup, sensitivity, or interim analysis due to the small  
264 sample size.

### 265 **Quality Assurance**

266 The principal investigator along with a member of institutional ethics committee will  
267 systematically monitor and evaluate the various aspects of project to ensure standards of quality  
268 are met. Standards of quality include Good Clinical Practice Guidelines, ethical conduct for  
269 Research, study protocol and institutional policies. All investigators will participate in a training  
270 session before the commencement of the study to ensure about the consistency of data collection  
271 and study procedures. Data will be managed in a secured computer system by a dedicated  
272 neurosurgery resident under the supervision of the principal investigator. In case of any doubt or  
273 uncertainty about data forms, the site investigators will be informed.

274 Also, for further assurance, multiple checkpoints are defined during the trial, including the  
275 presence of signed informed consents obtained by the neurosurgery residents, respect of the  
276 inclusion and exclusion criteria, appropriate and instant reporting of any adverse events, and the  
277 monitoring of all steps of the follow-up. All the files and data will be sealed and archived in a  
278 secure place at the end of the trial, once the final analysis is completed.

## 279 **Trial Status**

280 The trial is in the recruitment phase and patient enrolment is planned to be completed in April  
281 2022, and the last recruited patient will be due for final outcome assessment in July 2022.

## 282 **Safety Considerations**

283 Concerning complications of NSAIDs, patients are classified into three categories: low,  
284 moderate, and high risk<sup>28</sup>. Low-risk patients are younger than 65 years without any  
285 cardiovascular risk factors. Moderate-risk patients are those 65 years of age or older without a  
286 history of gastrointestinal ulcer and had mild cardiovascular risk factors. Patients who are over  
287 65 years old who have kidney or liver diseases or hypertension, having a history of a  
288 gastrointestinal ulcer or multiple gastrointestinal risk factors, history of cardiovascular diseases,  
289 as well as having a history of heart failure are considered as a high-risk patient<sup>28</sup>. In the first  
290 group, routine care will be provided. Pantoprazole is administered in the moderate risk and high-  
291 risk group along with ibuprofen. We strictly monitor blood pressure as a part of our routine  
292 management of all patients in ICU. Moreover, urea, creatinine, and electrolytes (sodium,  
293 potassium) of moderate-risk patients will be measured every three days, while the same tests will  
294 be requested for the high-risk group every day<sup>28</sup>. Administration of the study drug ceases if any  
295 serious adverse events happen or adverse effects prevent the tolerability of the Ibuprofen  
296 **(Supplemental digital content, parts 5, 6)** or the patient wishes to withdraw the consent before  
297 the study ends.

298 Based on the recommendation of extension of the CONSORT statement on better reporting of  
299 harms in randomized trials<sup>27 29</sup>, we will collect and appropriately report all good and bad events  
300 and outcomes so that they may be compared across treatment groups. Also, according to the

1  
2  
3 301 same statement, the balance of benefits and harm will be discussed in the final publication of the  
4  
5 302 pilot trial. In addition, for assessing the severity of adverse events (including clinical and  
6  
7 303 laboratory abnormalities) and grading them among the participants, we will use the Table for  
8  
9 304 Grading the Severity of Adult and Pediatric Adverse Events.<sup>30</sup> Four comprehensive sections  
10  
11 305 regarding the management and reporting adverse events are provided in the **Supplemental**  
12  
13 306 **digital content, parts 5, 6, 7, and 8.**

### 14 15 16 17 307 **Follow-up**

18  
19  
20  
21 308 The clinical team will do in person follow up with the patients every day for any adverse events  
22  
23 309 during initial admission and weekly for the first three weeks if discharged. A 3- month in person  
24  
25 310 visit or phone interview is arranged for the assessment of disability outcomes and possible  
26  
27 311 adverse events. Contact information will be available for the enrolled patients for questions or  
28  
29 312 possible adverse event reports during the study period.

### 30 31 32 33 34 313 **Expected Outcomes of the study**

35  
36  
37 314 The key expected result of this pilot study is the feasibility and safety assessment of the  
38  
39 315 administration of Ibuprofen in patients with aSAH. The objectives of the definitive trial are  
40  
41 316 mentioned in the methods section. During the pilot trial, we will collect information on all  
42  
43 317 outcomes for the definitive trial.

44  
45  
46 318

47  
48  
49 319

50  
51 320

52  
53 321

54  
55  
56 322

### 323 **Duration of the Project**

324 This project is scheduled to last 24 months. First patient recruited at June 2020 and the last one is  
325 planned to be included by April 2022, the end of the follow-up period for the last patient would  
326 be July 2022.

### 327 **Project Management**

328 Principal investigator: Oversight of all study procedures and managing the relations with the  
329 source of funding.

330 Research scientist: Study design, drafting of the proposal, RCT registration, drafting of the  
331 manuscript.

332 Study coordinator: Blinding, randomization of the participants, organizing datasheets,  
333 coordinating members of the team.

334 Neurosurgery residents: Check patients' eligibility, consenting, assessing clinical DCI,  
335 diagnosing, and managing of the adverse events, order TCD, and Ibuprofen.

336 Neurologist: A clinical stroke fellow will do the TCD.

337 Statistician: Assistance regarding study design, revising the manuscript, data analysis.

338

### 339 **Ethics and dissemination**

340 This study is approved by Mashhad University of Medical Sciences (MUMS) ethical committee  
341 (IR.MUMS.MEDICAL.REC.1398.225). Written informed consent will be obtained from the  
342 eligible patients or next of kin for enrollment to the study.

### 343 **Dissemination policy**

344 Results from the study will be submitted for publication regardless of whether or not there are  
345 significant findings. Every attempt will be made to ensure that the amount of time between

1  
2  
3 346 completing data collection and the release of study findings is minimized. The Methods Centre  
4  
5 347 will also be responsible for reporting required results on the ISRCTN registry.  
6  
7  
8 348

9  
10 349 **Patient and public involvement**

11  
12 350 Patients and public were not involved in this study.  
13  
14  
15

16  
17 351 **DISCUSSION**

18  
19 352 Cerebral vasospasm is a common devastating complication of the aSAH. Pharmacological  
20  
21 353 management of this clinical problem is still a controversial issue.

22  
23 354 We have found some pieces of evidence through in vitro <sup>31</sup>, animal <sup>18 32</sup>, and human <sup>33 34</sup> studies  
24  
25 355 indicating that some NSAIDs might be a promising choice to be used as a repurposing approved  
26  
27 356 agent for the prevention of cerebral vasospasm secondary to aSAH.

28  
29 357 In a propensity score-matched analysis study by Nassiri et al. <sup>33</sup>, consumption of NSAIDs with  
30  
31 358 various therapeutic indications was assessed in patients with aSAH. Results demonstrated a  
32  
33 359 reduction in mortality and improved functional outcomes <sup>24</sup>. These effects were independent of  
34  
35 360 the development of DCI or vasospasm. Furthermore, patients treated with NSAIDs had reduced  
36  
37 361 ICU and hospital stay. The authors hypothesized that inflammation may have a critical role in  
38  
39 362 development of poor outcomes (disability and death) after aSAH and patients with aSAH may  
40  
41 363 find some benefit from NSAIDs.

42  
43 364 A large, high-quality trial is needed to establish whether adding ibuprofen to standard treatment  
44  
45 365 effectively reduces vasospasm after aSAH. Such a trial poses fundamental challenges for  
46  
47 366 methodological design as well as complexities of execution. Thus, a prerequisite pilot trial is  
48  
49 367 required to justify if the preliminary plan can be implemented in a larger definitive trial.  
50  
51  
52  
53  
54  
55  
56  
57  
58  
59  
60



1  
2  
3 368 Ibuprofen is an FDA-approved anti-inflammatory medication; however, using it in a new clinical  
4  
5 369 condition as a repurposing approved agent to prevent cerebral vasospasm requires further  
6  
7 370 evaluation. Since there is no previous phase III trial for this purpose, we planned to run  
8  
9 371 feasibility pilot study before the definitive trial.  
10  
11  
12

13 372

### 16 373 **Acknowledgements**

18 374 We appreciate the deputy of research at Mashhad University of Medical Sciences for the financial  
19  
20  
21 375 support of this project.  
22  
23

### 24 376 **Authors contribution**

27 377 SZ and MD conceptualized the study. MD, EM, VA, and BS designed the study, EM and MJY  
28  
29 378 coordinated the administrative tasks. EM, MD did the literature search, and drafted the initial  
30  
31 379 version of the manuscript. MD designed the concept map and all figures. JG, NG, and SZ and all  
32  
33 380 authors critically reviewed and approved the final manuscript as submitted.  
34  
35  
36

### 37 381 **Funding source**

39 382 Mashhad University of Medical Sciences, deputy of research, Grant No.971587.  
40  
41

### 42 383 **Declaration of interests**

44 384 All authors declare no conflict of interest.  
45  
46  
47  
48  
49  
50  
51  
52  
53  
54  
55  
56 388

1  
2  
3 **389 Figures and legends**  
4

5  
6 **390 Figure 1: Concept map depicting four major pathways for the occurrence of cerebral vasospasm**  
7  
8 **391 following aSAH.** Inflammatory pathway is shown in yellow and explains how Ibuprofen may act as a  
9  
10 **392 prophylactic agent in this scenario.** Numbers in parentheses are representative of corresponding reference  
11  
12 **393 for that branch, all concept map references are available in Supplemental digital content, part 1.**

13  
14  
15 **394 ICAM-1,** Intercellular Adhesion Molecule 1; **VCAM,** vascular cell adhesion molecule; **ET,** endothelin;  
16  
17 **395 ROS,** Reactive oxygen species; **ETA,** endothelin A; **TXA2,** Thromboxane A2; **NO,** Nitric oxide; **cGMP,**  
18  
19 **396 Cyclic guanosine monophosphate; PGF2 $\alpha$ ,** Prostaglandin F2alpha; **PKC,** protein kinase C; **DAG,**  
20  
21 **397 Diacylglycerol; IP3,** Inositol trisphosphate; **Hb,** Hemoglobin; **SA,** subarachnoid; **Met,** Metabolic.

22  
23  
24 **398 Figure 2. Step-by-step flow diagram of the study**

25  
26  
27 **399 Figure 3. Timeline of the study**

28  
29  
30  
31 **400**

32  
33 **401 Supplemental Digital Content (SDC) #. Medium. Title.**

34  
35  
36 **402 SDC, part 1, Text, References of the concept map**

37  
38 **403 SDC, part 2, Text, Enrolment**

39  
40  
41 **404 SDC, part 3, Text, Criteria for the evaluation of vasospasm and disability**

42  
43  
44 **405 SDC, part 4, Text, Blinding**

45  
46  
47 **406 SDC, part 5, Text, Adverse events definition**

48  
49  
50 **407 SDC, part 6, Text, Serious adverse events**

51  
52  
53 **408 SDC, part 7, Text, Adverse Event (AE) Reporting**

54  
55  
56 **409 SDC, part 8, Text, References for supplementary text**  
57  
58  
59  
60

410 **References**

- 411 1. Feigin VL, Lawes CM, Bennett DA, et al. Worldwide stroke incidence and early case fatality reported  
412 in 56 population-based studies: a systematic review. *The Lancet Neurology* 2009;8(4):355-69. doi:  
413 10.1016/s1474-4422(09)70025-0 [published Online First: 2009/02/24]
- 414 2. Nieuwkamp DJ, Setz LE, Algra A, et al. Changes in case fatality of aneurysmal subarachnoid  
415 haemorrhage over time, according to age, sex, and region: a meta-analysis. *The Lancet Neurology*  
416 2009;8(7):635-42. doi: 10.1016/s1474-4422(09)70126-7 [published Online First: 2009/06/09]
- 417 3. Mayberg MR. Cerebral vasospasm. *Neurosurgery clinics of North America* 1998;9(3):615-27. [published  
418 Online First: 1998/07/21]
- 419 4. Claassen J, Bernardini GL, Kreiter K, et al. Effect of cisternal and ventricular blood on risk of delayed  
420 cerebral ischemia after subarachnoid hemorrhage: the Fisher scale revisited. *Stroke*  
421 2001;32(9):2012-20. [published Online First: 2001/09/08]
- 422 5. Kreiter KT, Copeland D, Bernardini GL, et al. Predictors of cognitive dysfunction after subarachnoid  
423 hemorrhage. *Stroke* 2002;33(1):200-8. [published Online First: 2002/01/10]
- 424 6. Mocco J, Zacharia BE, Komotar RJ, et al. A review of current and future medical therapies for cerebral  
425 vasospasm following aneurysmal subarachnoid hemorrhage. *Neurosurgical focus* 2006;21(3):E9.  
426 [published Online First: 2006/10/13]
- 427 7. Belen D, Besalti O, Yigitkanli K, et al. Leflunomide prevents vasospasm secondary to subarachnoid  
428 haemorrhage. *Acta neurochirurgica* 2007;149(10):1041-7; discussion 47-8. doi: 10.1007/s00701-  
429 007-1275-1 [published Online First: 2007/09/19]
- 430 8. Vural M, Cosan TE, Ozbek Z, et al. Digoxin may provide protection against vasospasm in subarachnoid  
431 haemorrhage. *Acta neurochirurgica* 2009;151(9):1135-41. doi: 10.1007/s00701-009-0391-5  
432 [published Online First: 2009/05/14]
- 433 9. Gunaldi O, Tugcu B, Colluoglu B, et al. Morphometric analysis of the influence of selenium over  
434 vasospastic femoral artery in rats. *Acta neurochirurgica* 2010;152(5):855-60. doi: 10.1007/s00701-  
435 010-0599-4 [published Online First: 2010/02/04]
- 436 10. Polin RS, Bavbek M, Shaffrey ME, et al. Detection of soluble E-selectin, ICAM-1, VCAM-1, and L-  
437 selectin in the cerebrospinal fluid of patients after subarachnoid hemorrhage. *Journal of*  
438 *neurosurgery* 1998;89(4):559-67. doi: 10.3171/jns.1998.89.4.0559 [published Online First:  
439 1998/10/07]
- 440 11. Chaichana KL, Pradilla G, Huang J, et al. Role of inflammation (leukocyte-endothelial cell interactions)  
441 in vasospasm after subarachnoid hemorrhage. *World neurosurgery* 2010;73(1):22-41. doi:  
442 10.1016/j.surneu.2009.05.027 [published Online First: 2010/05/11]
- 443 12. Muroi C, Hugelshofer M, Seule M, et al. Correlation among systemic inflammatory parameter,  
444 occurrence of delayed neurological deficits, and outcome after aneurysmal subarachnoid  
445 hemorrhage. *Neurosurgery* 2013;72(3):367-75; discussion 75. doi:  
446 10.1227/NEU.0b013e31828048ce [published Online First: 2012/12/05]
- 447 13. Tam AK, Ilodigwe D, Mocco J, et al. Impact of systemic inflammatory response syndrome on  
448 vasospasm, cerebral infarction, and outcome after subarachnoid hemorrhage: exploratory analysis  
449 of CONSCIOUS-1 database. *Neurocritical care* 2010;13(2):182-9. doi: 10.1007/s12028-010-  
450 9402-x [published Online First: 2010/07/02]
- 451 14. Ibrahim GM, Morgan BR, Macdonald RL. Patient phenotypes associated with outcomes after  
452 aneurysmal subarachnoid hemorrhage: a principal component analysis. *Stroke* 2014;45(3):670-6.  
453 doi: 10.1161/strokeaha.113.003078 [published Online First: 2014/01/16]
- 454 15. Larson RS, Springer TA. Structure and function of leukocyte integrins. *Immunological reviews*  
455 1990;114:181-217. [published Online First: 1990/04/01]
- 456 16. de Fougerolles AR, Stacker SA, Schwarting R, et al. Characterization of ICAM-2 and evidence for a  
457 third counter-receptor for LFA-1. *The Journal of experimental medicine* 1991;174(1):253-67. doi:  
458 10.1084/jem.174.1.253 [published Online First: 1991/07/01]

- 1  
2  
3 459 17. Lollo BA, Chan KW, Hanson EM, et al. Direct evidence for two affinity states for lymphocyte function-  
4 460 associated antigen 1 on activated T cells. *The Journal of biological chemistry* 1993;268(29):21693-  
5 461 700. [published Online First: 1993/10/15]
- 6 462 18. Frazier JL, Pradilla G, Wang PP, et al. Inhibition of cerebral vasospasm by intracranial delivery of  
7 463 ibuprofen from a controlled-release polymer in a rabbit model of subarachnoid hemorrhage.  
8 464 *Journal of neurosurgery* 2004;101(1):93-8. doi: 10.3171/jns.2004.101.1.0093 [published Online  
9 465 First: 2004/07/17]
- 10 466 19. Young AM, Karri SK, Ogilvy CS. Non-steroidal anti-inflammatory drugs used as a treatment modality  
11 467 in subarachnoid hemorrhage. *Current drug safety* 2012;7(3):197-201. [published Online First:  
12 468 2012/09/07]
- 13 469 20. Mendelow AD, Stockdill G, Steers AJ, et al. Double-blind trial of aspirin in patient receiving tranexamic  
14 470 acid for subarachnoid hemorrhage. *Acta neurochirurgica* 1982;62(3-4):195-202. [published Online  
15 471 First: 1982/01/01]
- 16 472 21. Hop JW, Rinkel GJ, Algra A, et al. Randomized pilot trial of postoperative aspirin in subarachnoid  
17 473 hemorrhage. *Neurology* 2000;54(4):872-8. doi: 10.1212/wnl.54.4.872 [published Online First:  
18 474 2000/02/26]
- 19 475 22. van den Bergh WM, Algra A, Dorhout Mees SM, et al. Randomized controlled trial of acetylsalicylic  
20 476 acid in aneurysmal subarachnoid hemorrhage: the MASH Study. *Stroke* 2006;37(9):2326-30. doi:  
21 477 10.1161/01.STR.0000236841.16055.0f [published Online First: 2006/08/05]
- 22 478 23. Ghodsi SM, Mohebbi N, Naderi S, et al. Comparative efficacy of meloxicam and placebo in vasospasm  
23 479 of patients with subarachnoid hemorrhage. *Iranian journal of pharmaceutical research : IJPR*  
24 480 2015;14(1):125-30. [published Online First: 2015/01/07]
- 25 481 24. Chan AW, Tetzlaff JM, Gøtzsche PC, et al. SPIRIT 2013 explanation and elaboration: guidance for  
26 482 protocols of clinical trials. *BMJ (Clinical research ed)* 2013;346:e7586. doi: 10.1136/bmj.e7586  
27 483 [published Online First: 2013/01/11]
- 28 484 25. Connolly ES, Jr., Rabinstein AA, Carhuapoma JR, et al. Guidelines for the management of aneurysmal  
29 485 subarachnoid hemorrhage: a guideline for healthcare professionals from the American Heart  
30 486 Association/american Stroke Association. *Stroke* 2012;43(6):1711-37. doi:  
31 487 10.1161/STR.0b013e3182587839
- 32 488 26. Lachin JM, Matts JP, Wei L. Randomization in clinical trials: conclusions and recommendations.  
33 489 *Controlled clinical trials* 1988;9(4):365-74.
- 34 490 27. Eldridge SM, Chan CL, Campbell MJ, et al. CONSORT 2010 statement: extension to randomised pilot  
35 491 and feasibility trials. *BMJ (Clinical research ed)* 2016;355:i5239. doi: 10.1136/bmj.i5239  
36 492 [published Online First: 2016/10/26]
- 37 493 28. Crofford LJ. Use of NSAIDs in treating patients with arthritis. *Arthritis research & therapy* 2013;15  
38 494 Suppl 3:S2. doi: 10.1186/ar4174 [published Online First: 2013/12/07]
- 39 495 29. Ioannidis JP, Evans SJ, Gøtzsche PC, et al. Better reporting of harms in randomized trials: an extension  
40 496 of the CONSORT statement. *Ann Intern Med* 2004;141(10):781-8. doi: 10.7326/0003-4819-141-  
41 497 10-200411160-00009 [published Online First: 2004/11/17]
- 42 498 30. Division of AIDS (DAIDS) Table for Grading the Severity of Adult and Pediatric Adverse Events.  
43 499 Corrected Version 2.1 ed. United States: National Institute of Allergy and Infectious Diseases,  
44 500 National Institutes of Health, 2017.
- 45 501 31. Kapiotis S, Sengoelge G, Sperr WR, et al. Ibuprofen inhibits pyrogen-dependent expression of VCAM-1  
46 502 and ICAM-1 on human endothelial cells. *Life Sci* 1996;58(23):2167-81.
- 47 503 32. White RP, Robertson JT. Comparison of piroxicam, meclofenamate, ibuprofen, aspirin, and  
48 504 prostacyclin efficacy in a chronic model of cerebral vasospasm. *Neurosurgery* 1983;12(1):40-6.  
49 505 doi: 10.1227/00006123-198301000-00008
- 50 506 33. Nassiri F, Ibrahim GM, Badhiwala JH, et al. A Propensity Score-Matched Study of the Use of Non-  
51 507 steroidal Anti-inflammatory Agents Following Aneurysmal Subarachnoid Hemorrhage.  
52 508 *Neurocritical care* 2016;25(3):351-58. doi: 10.1007/s12028-016-0266-6 [published Online First:  
53 509 2016/03/24]

1  
2  
3  
4  
5  
6  
7  
8  
9  
10  
11  
12  
13  
14  
15  
16  
17  
18  
19  
20  
21  
22  
23  
24  
25  
26  
27  
28  
29  
30  
31  
32  
33  
34  
35  
36  
37  
38  
39  
40  
41  
42  
43  
44  
45  
46  
47  
48  
49  
50  
51  
52  
53  
54  
55  
56  
57  
58  
59  
60

510 34. Muroi C, Hugelshofer M, Seule M, et al. The impact of nonsteroidal anti-inflammatory drugs on  
511 inflammatory response after aneurysmal subarachnoid hemorrhage. *Neurocritical care*  
512 2014;20(2):240-6. doi: 10.1007/s12028-013-9930-2

513

For peer review only



Figure 1. Concept map depicting four major pathways for the occurrence of cerebral vasospasm following aSAH. Inflammatory pathway is shown in yellow and explains how Ibuprofen may act as a prophylactic agent in this scenario. Numbers in parentheses are representative of corresponding reference for that branch, all concept map references are available in Supplemental digital content, part 1. ICAM-1, Intercellular Adhesion Molecule 1; VCAM, vascular cell adhesion molecule; ET, endothelin; ROS, Reactive oxygen species; ETA, endothelin A; TXA2, Thromboxane A2; NO, Nitric oxide; cGMP, Cyclic guanosine monophosphate; PGF2, Prostaglandin F2alpha; PKC, protein kinase C; DAG, Diacylglycerol; IP3, Inositol trisphosphate; Hb, Hemoglobin; SA, subarachnoid; Met, Metabolic.

1057x595mm (72 x 72 DPI)

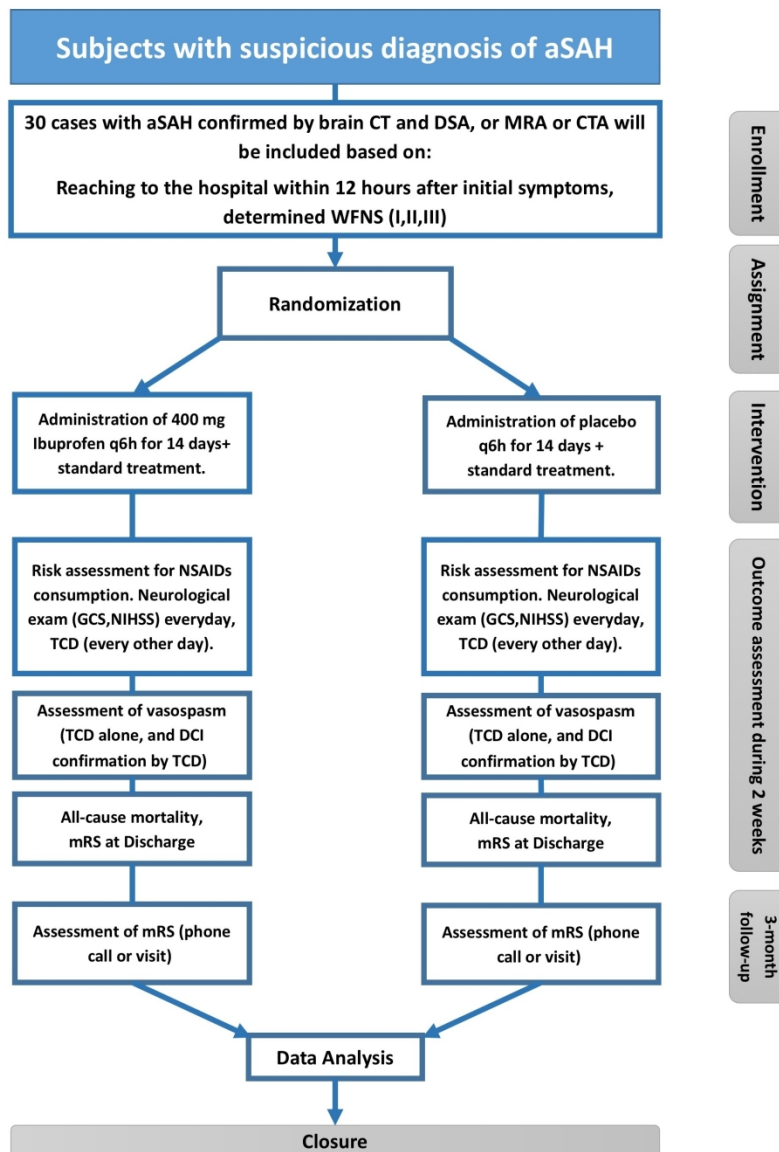

Figure 2. Step-by-step flow diagram of the study.

169x240mm (300 x 300 DPI)

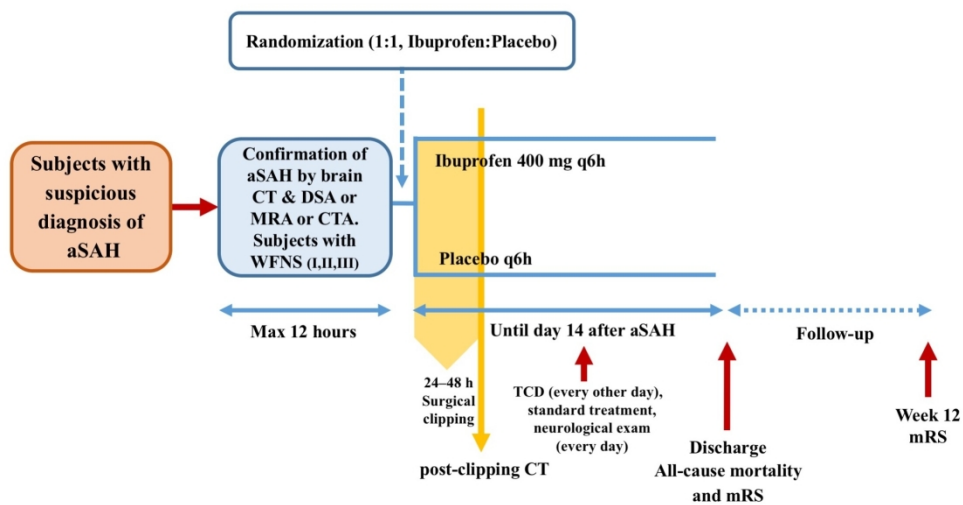

Figure 3. Timeline of the study

734x396mm (72 x 72 DPI)



## Supplemental digital content (SDC)

### Prophylactic effects of Ibuprofen on cerebral vasospasm following aneurysmal subarachnoid hemorrhage: Protocol for a randomised placebo-controlled pilot trial

#### Authors:

Mojtaba Dayyani<sup>1,2</sup>, Ermia Mousavi Mohammadi<sup>2</sup>, Vahid Ashoorion<sup>3</sup>, Behnam Sadeghirad<sup>3</sup>, Mohammadreza javedani yekta<sup>2</sup>, James Grotta<sup>4</sup>, Nestor Gonzalez<sup>5</sup>, Samira Zabihyan<sup>2,\*</sup>

#### Table of Contents

|                                                                             |          |
|-----------------------------------------------------------------------------|----------|
| <b>SDC, PART 1. REFERENCES OF THE CONCEPT MAP</b>                           | <b>2</b> |
| <b>SDC, PART 2. ENROLMENT</b>                                               | <b>3</b> |
| <b>SDC, PART 3. CRITERIA FOR THE EVALUATION OF VASOSPASM AND DISABILITY</b> | <b>4</b> |
| <b>SDC, PART 4. BLINDING</b>                                                | <b>4</b> |
| <b>SDC, PART 5. ADVERSE EVENTS DEFINITION</b>                               | <b>5</b> |
| <b>SDC, PART 6. SERIOUS ADVERSE EVENTS</b>                                  | <b>5</b> |
| <b>SDC, PART 7. ADVERSE EVENT (AE) REPORTING</b>                            | <b>7</b> |
| <b>SDC, PART 8. REFERENCES FOR SUPPLEMENTARY TEXT</b>                       | <b>7</b> |

## SDC, part 1. References of the concept map

1. Chaichana KL, Pradilla G, Huang J, Tamargo RJ. Role of inflammation (leukocyte-endothelial cell interactions) in vasospasm after subarachnoid hemorrhage. *World Neurosurg*. 2010;73(1):22-41.
2. Viski S, Olah L. Use of Transcranial Doppler in Intensive Care Unit. *J Crit Care Med (Targu Mures)*. 2017;3(3):99-104.
3. Nassiri F, Ibrahim GM, Badhiwala JH, et al. A Propensity Score-Matched Study of the Use of Non-steroidal Anti-inflammatory Agents Following Aneurysmal Subarachnoid Hemorrhage. *Neurocrit Care*. 2016;25(3):351-358.
4. Ibuprofen: Drug information. In: *UpToDate*. 2017.
5. Brooks PM, Day RO. Nonsteroidal antiinflammatory drugs—differences and similarities. *New England Journal of Medicine*. 1991;324(24):1716-1725.
6. Thygesen K, Alpert JS, Jaffe AS, Simoons ML, Chaitman BR, White HD. Third universal definition of myocardial infarction. *Circulation*. 2012;126(16):2020-2035.
7. Bhatt DL, Scheiman J, Abraham NS, et al. ACCF/ACG/AHA 2008 expert consensus document on reducing the gastrointestinal risks of antiplatelet therapy and NSAID use: a report of the American College of Cardiology Foundation Task Force on Clinical Expert Consensus Documents. *Journal of the American College of Cardiology*. 2008;52(18):1502-1517.
8. Huerta C, Castellsague J, Varas-Lorenzo C, Rodríguez LAG. Nonsteroidal anti-inflammatory drugs and risk of ARF in the general population. *American Journal of Kidney Diseases*. 2005;45(3):531-539.
9. Sachar H, Vaidya K, Laine L. Intermittent vs continuous proton pump inhibitor therapy for high-risk bleeding ulcers: a systematic review and meta-analysis. *JAMA internal medicine*. 2014;174(11):1755-1762.
10. Marmo R, Rotondano G, Piscopo R, Bianco MA, D'angella R, Cipolletta L. Dual therapy versus monotherapy in the endoscopic treatment of high-risk bleeding ulcers: a meta-analysis of controlled trials. *The American journal of gastroenterology*. 2007;102(2):279.
11. Shiba M, Suzuki H, Fujimoto M, et al. Role of platelet-derived growth factor in cerebral vasospasm after subarachnoid hemorrhage in rats. *Acta Neurochir Suppl*. 2013;115:219-223.
12. Chertow GM, Burdick E, Honour M, Bonventre JV, Bates DW. Acute kidney injury, mortality, length of stay, and costs in hospitalized patients. *Journal of the American Society of Nephrology*. 2005;16(11):3365-3370.
13. Whelton A, Stout RL, Spilman PS, Klassen DK. Renal effects of ibuprofen, piroxicam, and sulindac in patients with asymptomatic renal failure: a prospective, randomized, crossover comparison. *Annals of Internal Medicine*. 1990;112(8):568-576.
14. Luciano R. NSAIDs: Acute kidney injury (acute renal failure). In: Palevsky PM, Sheridan A, eds. *UpToDate*. 2017.
15. Bock SA, Muñoz-Furlong A, Sampson HA. Further fatalities caused by anaphylactic reactions to food, 2001-2006. *Journal of Allergy and Clinical Immunology*. 2007;119(4):1016.
16. Simons FER, Gu X, Simons KJ. Epinephrine absorption in adults: intramuscular versus subcutaneous injection. *Journal of Allergy and Clinical Immunology*. 2001;108(5):871-873.

17. Pumphrey RS. Fatal posture in anaphylactic shock. *Journal of Allergy and Clinical Immunology*. 2003;112(2):451-452.
18. Simons KJ, Simons FER. Epinephrine and its use in anaphylaxis: current issues. *Current opinion in allergy and clinical immunology*. 2010;10(4):354-361.

## SDC, part 2. Enrolment

Patient screening for eligibility and recruitment will be conducted at Ghaem Teaching Hospital, Mashhad, Iran. Two neurosurgery residents will first visit the patients and check the eligibility criteria in the emergency department. The neurosurgical intensive care unit of our center annually receives 100–150 patients with aSAH. Over twelve months, 30 eligible patients will be enrolled in our trial.

The recruited patient who met the criteria will sign and date the institutional informed consent form of the Mashhad University of Medical Sciences before allocating to each group and before initiation of any procedures related to the clinical investigation are performed. Then, required data will be gathered in specific datasheets, including demographic data (name, age, gender, address, and phone number), past medical history including cardiovascular, kidney, and liver diseases, previous episode of SAH, drug history including long term and recent use of any NSAIDs, anti-platelet medications and sensitivity to aspirin or any NSAIDs. Two nurses of the hospital's intensive care unit will fill case report forms (CRFs) and gather these data. In the absence of exclusion criteria, a file will be specified to each patient that contains a registration form, consent form, diagnostic form, and a 3-months follow-up evaluation sheet.

CRFs will be kept in a file that assigns to each patient. The research coordinator enters data from forms to a data management tool. Only the research coordinator has access to data in a password-protected spreadsheet till the study will be terminated. After this period, the research coordinator will send the spreadsheet to the method center located in the hospital. Also, to assess the patients' disability, a 3-months follow-up will be accomplished via a phone call or a clinic visit by two independent neurosurgery residents.

Participants who are unable to complete the protocol due to death, clinical complication, or being discharged for any reason will not be excluded from the study. The statisticians will apply the intention to treat analysis.

### SDC, part 3. Criteria for the evaluation of vasospasm and disability

Chronic vasospasm can occur clinically with signs and symptoms or non-clinically that would be diagnosed by imaging<sup>1</sup>. In this study, we defined clinical vasospasm as delayed cerebral ischemia (DCI) and diagnosed non-clinically by Transcranial Doppler (TCD). Acceptable definitions for DCI were the development of new, focal neurological deficits, and/or a decreased level of consciousness of at least two points on the Glasgow Coma Scale after other possible causes of deterioration have been excluded or a new infarct revealed by follow-up brain computed tomography,<sup>2,3</sup> or increases at least two scores of the National Institutes of Health Stroke Scale (NIHSS)<sup>4</sup>; in this condition, vasospasm will be confirmed by TCD.

The flow velocity of the middle cerebral artery (MCA) and the basilar artery is measured by TCD at the admission, then every two days. The timeline of the interventions is depicted in figure 3. In MCA, the flow velocity between 120-149 cm/s and Lindegaard ratio 3 to 6 was considered as mild vasospasm (25% vessel obstruction), velocity between 150-199 cm/s and Lindegaard ratio 3 to 6 as moderate vasospasm (50% obstruction) and a velocity more than or equal to 200 cm/s and a Lindegaard ratio greater than 6 as severe vasospasm (more than 50% occlusion). In the basilar artery, the flow velocity between 70-85 cm/s and Lindegaard ratio 2 to 2.49 was considered as mild vasospasm (25% vessel obstruction), the velocity greater than 85 cm/s, and Lindegaard ratio between 2.5 to 2.99 as moderate vasospasm (50% obstruction) and a velocity over 85 cm/s and the Lindegaard ratio greater than or equal to 3 as severe vasospasm (more than 50% obstruction)<sup>5</sup>.

Disability will be assessed at discharge and three months after discharge based on the Modified Rankin Scale (mRS). Favorable mRS outcomes are (mRS 1 and 2), and unfavorable outcomes are (mRS 3 to 6).

### SDC, part 4. Blinding

Participants of both groups will be blinded to take their correspondent medication or placebo. Also, ibuprofen and placebo will be packed in identical capsules, and they are not distinguishable by participants or study personnel.

The clinical team, including neurosurgeons, radiologists and, ICU department staff, and the neurologist who does TCD, are not aware of which group patients belong to. Outcomes will be recorded in a list based on patient allocation to either group A or B. Likewise, the statistician would

not be aware of what data belongs to either the intervention or placebo groups in the final datasheet. Breaking of the treatment codes will be carried out three months after the inclusion of the last eligible patient. All outcome assessments will be performed before the treatment codes are broken.

### SDC, part 5. Adverse events definition

Oral administration of ibuprofen has some common adverse reactions that their prevalence is ranged between 1-10%. In these conditions, it is not necessary to discontinue drug consumption. Edema due to fluid retention occurs in 1 to 3%. Central nervous system reactions included dizziness (3-9%), headache (1-3%), and nervousness (1-3%). Skin rashes (3-9%) and pruritus (1-3%) are dermatologic reactions that may occur by ibuprofen consumption. There are some adverse events in the gastrointestinal system which may arise from ibuprofen, including epigastric pain (3-9%), heartburn (3-9%), nausea (3-9%), abdominal pain (1-3%), constipation (1-3%), decreased appetite (1-3%), diarrhea (1-3%), dyspepsia (1-3%), vomiting (1-3%). Tinnitus is the otic complications which may happen by the prevalence of 3-9%<sup>6</sup>.

### SDC, part 6. Serious adverse events

The first possible serious adverse events are cardiovascular thrombotic events, including myocardial infarction (MI). Another serious cardiovascular event is new-onset hypertension or exacerbation of hypertension<sup>7</sup>. We will strictly monitor blood pressure as a part of our routine management in the ICU, which helps us detect this event before its remarkable increment.

In general, using the lowest effective dose for the shortest duration of time might reduce the risk of cardiovascular events. In our study, these conditions are considered. In case of any clinical suspicion for MI, in the initial assessment phase, a 12-lead ECG, an abbreviated history, and physical examination will obtain within 10 minutes<sup>8</sup>. Then, the serum level of Troponin-I will be measured, and cardiology consultation will be requested for further evaluation or possible therapeutic interventions.

Gastrointestinal events, including an increased risk of ulceration, bleeding, and perforation, are the second possible serious adverse events. Elderly patients and patients with a history of peptic ulcer disease and/or GI bleeding are at greater risk for serious GI events<sup>9</sup>. We avoid enrolling

1  
2  
3 patients with a history of acute GI bleeding. Concomitant gastro-protective therapy (e.g., proton  
4 pump inhibitors (PPIs) <sup>10</sup> is recommended; as mentioned in the safety section, we use PPIs for all  
5 study participants. For the initial evaluation of the patient with the signs of active upper GI  
6 bleeding, hemodynamic stability, and the necessity for fluid resuscitation will be assessed.  
7  
8 Intravenous pantoprazole at the dose of 40 mg twice daily will be initiated for these patients <sup>11</sup>.  
9  
10 Endoscopy within 24 hours of presentation for the diagnosis and treatment of active upper GI  
11 bleeding will be accomplished <sup>12</sup>.  
12  
13  
14  
15

16 The third serious adverse event secondary to ibuprofen use is the accentuation of existing renal  
17 dysfunction that is dose-dependent <sup>10</sup>. The proposed criteria for acute kidney injury<sup>13</sup> include an  
18 increase in serum creatinine by  $\geq 0.3$  mg/dL within 48 hours or an increase to  $\geq 1.5$  times the  
19 presumed baseline value that is known to have occurred within the last seven days or a decrease  
20 in urine volume to  $< 3$  mL/kg over six hours <sup>14</sup>. The diagnosis of hemodynamically mediated AKI  
21 associated with NSAIDs is suggested by recent NSAID use, the absence of significant  
22 proteinuria ( $< 500$  mg/day), hematuria, and the bland urine sediment. Among patients with AKI,  
23 generally, a renal ultrasound will be done to exclude possible obstruction. In general, the  
24 diagnosis is made when kidney function recovery occurs after the NSAID is discontinued <sup>15</sup>. For  
25 the treatment of NSAID-induced AKI, the NSAID should be stopped immediately, volume  
26 resuscitation will be provided in states of hypovolemia and continued based on a reassessment of  
27 volume status including blood pressure/pulse and urine output <sup>16</sup>.  
28  
29  
30  
31  
32  
33  
34  
35  
36  
37

38 The fourth serious adverse event is anaphylactic reactions. The most common signs and  
39 symptoms are cutaneous (e.g. sudden onset of generalized urticarial, angioedema, flushing, and  
40 pruritus). Airway will be assessed at first <sup>17</sup>. Epinephrine will be given 0.3 to 0.5 mg  
41 intramuscularly (IM), which can be repeated every 5 to 15 minutes. Oxygen will be given 8-10  
42 L/min via face mask as needed. Hypotension, if occurs, will be managed via rapid infusion of 1  
43 to 2 liters intravenously. Adjunctive therapies including IV diphenhydramine 25 to 50 mg, IV  
44 ranitidine 50 mg, IV methylprednisolone 125 mg, and monitoring hemodynamic, pulse oximetry,  
45 and urine output will be considered as appropriate <sup>18-20</sup>.  
46  
47  
48  
49  
50  
51

52 Unanticipated problems resulting in risk to participant or others

53 Any incident, experience, or outcome that meets the following criteria:  
54  
55  
56  
57  
58  
59  
60

- Unexpected in nature, severity, or frequency (e.g., not described in study-related documents such as the ethics-approved protocol or consent form, etc.).
- Related or possibly related to participation in the research (i.e., possibly related means there is a reasonable possibility that the incident experience or outcome may have been caused by the procedures involved in the research), and suggests that the research places participants or others at greater risk of harm (including physical, psychological, economic, or social harm)

### SDC, part 7. Adverse Event (AE) Reporting

The clinical site (ICU nurse and neurosurgery resident) is responsible for reporting AEs to the Methods Centre promptly. Significant new information on ongoing AEs should also be provided promptly to the Methods Centre via the data capture system. Unanticipated problems resulting in risk to participants or others are also to be reported promptly to the Methods Centre.

The clinical site is responsible for reporting AEs and unanticipated problems resulting in risk to participants or others to their local ethics committee in accordance with local reporting requirements. Copies of each report and documentation of ethic board notification and receipt will be kept in the clinical site's study file. The Methods Centre will be responsible for reporting any applicable adverse events to the relevant regulatory bodies (e.g., Food and Drug organization, adverse events registration).

### SDC, part 8. References for supplementary text

1. Chaichana KL, Pradilla G, Huang J, Tamargo RJ. Role of inflammation (leukocyte-endothelial cell interactions) in vasospasm after subarachnoid hemorrhage. *World Neurosurg.* 2010;73(1):22-41.
2. Vergouwen MD, Participants in the International Multi-Disciplinary Consensus Conference on the Critical Care Management of Subarachnoid H. Vasospasm versus delayed cerebral ischemia as an outcome event in clinical trials and observational studies. *Neurocrit Care.* 2011;15(2):308-311.
3. Vergouwen MDI, Vermeulen M, Gijn Jv, et al. Definition of Delayed Cerebral Ischemia After Aneurysmal Subarachnoid Hemorrhage as an Outcome Event in Clinical Trials and Observational Studies. *Stroke.* 2010;41(10):2391-2395.

4. Nassiri F, Ibrahim GM, Badhiwala JH, et al. A Propensity Score-Matched Study of the Use of Non-steroidal Anti-inflammatory Agents Following Aneurysmal Subarachnoid Hemorrhage. *Neurocrit Care*. 2016;25(3):351-358.
5. Viski S, Olah L. Use of Transcranial Doppler in Intensive Care Unit. *J Crit Care Med (Targu Mures)*. 2017;3(3):99-104.
6. Ibuprofen: Drug information. In: *UpToDate*.2017.
7. Brooks PM, Day RO. Nonsteroidal antiinflammatory drugs—differences and similarities. *New England Journal of Medicine*. 1991;324(24):1716-1725.
8. Thygesen K, Alpert JS, Jaffe AS, Simoons ML, Chaitman BR, White HD. Third universal definition of myocardial infarction. *Circulation*. 2012;126(16):2020-2035.
9. Bhatt DL, Scheiman J, Abraham NS, et al. ACCF/ACG/AHA 2008 expert consensus document on reducing the gastrointestinal risks of antiplatelet therapy and NSAID use: a report of the American College of Cardiology Foundation Task Force on Clinical Expert Consensus Documents. *Journal of the American College of Cardiology*. 2008;52(18):1502-1517.
10. Huerta C, Castellsague J, Varas-Lorenzo C, Rodríguez LAG. Nonsteroidal anti-inflammatory drugs and risk of ARF in the general population. *American Journal of Kidney Diseases*. 2005;45(3):531-539.
11. Sachar H, Vaidya K, Laine L. Intermittent vs continuous proton pump inhibitor therapy for high-risk bleeding ulcers: a systematic review and meta-analysis. *JAMA internal medicine*. 2014;174(11):1755-1762.
12. Marmo R, Rotondano G, Piscopo R, Bianco MA, D'angella R, Cipolletta L. Dual therapy versus monotherapy in the endoscopic treatment of high-risk bleeding ulcers: a meta-analysis of controlled trials. *The American journal of gastroenterology*. 2007;102(2):279.
13. Shiba M, Suzuki H, Fujimoto M, et al. Role of platelet-derived growth factor in cerebral vasospasm after subarachnoid hemorrhage in rats. *Acta Neurochir Suppl*. 2013;115:219-223.
14. Chertow GM, Burdick E, Honour M, Bonventre JV, Bates DW. Acute kidney injury, mortality, length of stay, and costs in hospitalized patients. *Journal of the American Society of Nephrology*. 2005;16(11):3365-3370.
15. Whelton A, Stout RL, Spilman PS, Klassen DK. Renal effects of ibuprofen, piroxicam, and sulindac in patients with asymptomatic renal failure: a prospective, randomized, crossover comparison. *Annals of Internal Medicine*. 1990;112(8):568-576.
16. Luciano R. NSAIDs: Acute kidney injury (acute renal failure). In: Palevsky PM, Sheridan A, eds. *UpToDate*.2017.
17. Bock SA, Muñoz-Furlong A, Sampson HA. Further fatalities caused by anaphylactic reactions to food, 2001-2006. *Journal of Allergy and Clinical Immunology*. 2007;119(4):1016.
18. Simons FER, Gu X, Simons KJ. Epinephrine absorption in adults: intramuscular versus subcutaneous injection. *Journal of Allergy and Clinical Immunology*. 2001;108(5):871-873.
19. Pumphrey RS. Fatal posture in anaphylactic shock. *Journal of Allergy and Clinical Immunology*. 2003;112(2):451-452.
20. Simons KJ, Simons FER. Epinephrine and its use in anaphylaxis: current issues. *Current opinion in allergy and clinical immunology*. 2010;10(4):354-361.



1  
2  
3  
4  
5  
6  
7  
8  
9  
10  
11  
12  
13  
14  
15  
16  
17  
18  
19  
20  
21  
22  
23  
24  
25  
26  
27  
28  
29  
30  
31  
32  
33  
34  
35  
36  
37  
38  
39  
40  
41  
42  
43  
44  
45  
46  
47  
48  
49  
50  
51  
52  
53  
54  
55  
56  
57  
58  
59  
60

For peer review only



STANDARD PROTOCOL ITEMS: RECOMMENDATIONS FOR INTERVENTIONAL TRIALS

SPIRIT 2013 Checklist: Recommended items to address in a clinical trial protocol and related documents\*

| Section/item                      | Item No | Description                                                                                                                                                                                                                                                                              | Page No in the manuscript |
|-----------------------------------|---------|------------------------------------------------------------------------------------------------------------------------------------------------------------------------------------------------------------------------------------------------------------------------------------------|---------------------------|
| <b>Administrative information</b> |         |                                                                                                                                                                                                                                                                                          |                           |
| Title                             | 1       | Descriptive title identifying the study design, population, interventions, and, if applicable, trial acronym                                                                                                                                                                             | 1                         |
| Trial registration                | 2a      | Trial identifier and registry name. If not yet registered, name of intended registry                                                                                                                                                                                                     | 1                         |
|                                   | 2b      | All items from the World Health Organization Trial Registration Data Set                                                                                                                                                                                                                 | N/A                       |
| Protocol version                  | 3       | Date and version identifier                                                                                                                                                                                                                                                              | N/A                       |
| Funding                           | 4       | Sources and types of financial, material, and other support                                                                                                                                                                                                                              | 17                        |
| Roles and responsibilities        | 5a      | Names, affiliations, and roles of protocol contributors                                                                                                                                                                                                                                  | Title page and 17         |
|                                   | 5b      | Name and contact information for the trial sponsor                                                                                                                                                                                                                                       | Title page                |
|                                   | 5c      | Role of study sponsor and funders, if any, in study design; collection, management, analysis, and interpretation of data; writing of the report; and the decision to submit the report for publication, including whether they will have ultimate authority over any of these activities | None                      |
|                                   | 5d      | Composition, roles, and responsibilities of the coordinating centre, steering committee, endpoint adjudication committee, data management team, and other individuals or groups overseeing the trial, if applicable (see Item 21a for data monitoring committee)                         | 11, 14, 15                |
| <b>Introduction</b>               |         |                                                                                                                                                                                                                                                                                          |                           |
| Background and rationale          | 6a      | Description of research question and justification for undertaking the trial, including summary of relevant studies (published and unpublished) examining benefits and harms for each intervention                                                                                       | 5, 6                      |
|                                   | 6b      | Explanation for choice of comparators                                                                                                                                                                                                                                                    | 6, 9                      |

|    |                                                           |     |                                                              |             |
|----|-----------------------------------------------------------|-----|--------------------------------------------------------------|-------------|
| 1  |                                                           |     |                                                              |             |
| 2  | Objectives                                                | 7   | Specific objectives or hypotheses                            | 7, 8        |
| 3  |                                                           |     |                                                              |             |
| 4  | Trial design                                              | 8   | Description of trial design including type of trial (eg,     | 7           |
| 5  |                                                           |     | parallel group, crossover, factorial, single group),         |             |
| 6  |                                                           |     | allocation ratio, and framework (eg, superiority,            |             |
| 7  |                                                           |     | equivalence, noninferiority, exploratory)                    |             |
| 8  |                                                           |     |                                                              |             |
| 9  |                                                           |     |                                                              |             |
| 10 |                                                           |     |                                                              |             |
| 11 | <b>Methods: Participants, interventions, and outcomes</b> |     |                                                              |             |
| 12 |                                                           |     |                                                              |             |
| 13 | Study setting                                             | 9   | Description of study settings (eg, community clinic,         | 9           |
| 14 |                                                           |     | academic hospital) and list of countries where data will be  |             |
| 15 |                                                           |     | collected. Reference to where list of study sites can be     |             |
| 16 |                                                           |     | obtained                                                     |             |
| 17 |                                                           |     |                                                              |             |
| 18 | Eligibility                                               | 10  | Inclusion and exclusion criteria for participants. If        | 8, 9        |
| 19 | criteria                                                  |     | applicable, eligibility criteria for study centres and       |             |
| 20 |                                                           |     | individuals who will perform the interventions (eg,          |             |
| 21 |                                                           |     | surgeons, psychotherapists)                                  |             |
| 22 |                                                           |     |                                                              |             |
| 23 |                                                           |     |                                                              |             |
| 24 | Interventions                                             | 11a | Interventions for each group with sufficient detail to allow | 9           |
| 25 |                                                           |     | replication, including how and when they will be             |             |
| 26 |                                                           |     | administered                                                 |             |
| 27 |                                                           |     |                                                              |             |
| 28 |                                                           |     |                                                              |             |
| 29 |                                                           | 11b | Criteria for discontinuing or modifying allocated            | 13 and      |
| 30 |                                                           |     | interventions for a given trial participant (eg, drug dose   | supplement  |
| 31 |                                                           |     | change in response to harms, participant request, or         | 4,5, and 6  |
| 32 |                                                           |     | improving/worsening disease)                                 |             |
| 33 |                                                           |     |                                                              |             |
| 34 |                                                           | 11c | Strategies to improve adherence to intervention protocols,   | 12, 14, 15  |
| 35 |                                                           |     | and any procedures for monitoring adherence (eg, drug        |             |
| 36 |                                                           |     | tablet return, laboratory tests)                             |             |
| 37 |                                                           |     |                                                              |             |
| 38 |                                                           |     |                                                              |             |
| 39 |                                                           | 11d | Relevant concomitant care and interventions that are         | 9, 13       |
| 40 |                                                           |     | permitted or prohibited during the trial                     |             |
| 41 |                                                           |     |                                                              |             |
| 42 | Outcomes                                                  | 12  | Primary, secondary, and other outcomes, including the        | 8, 9        |
| 43 |                                                           |     | specific measurement variable (eg, systolic blood            |             |
| 44 |                                                           |     | pressure), analysis metric (eg, change from baseline, final  |             |
| 45 |                                                           |     | value, time to event), method of aggregation (eg, median,    |             |
| 46 |                                                           |     | proportion), and time point for each outcome. Explanation    |             |
| 47 |                                                           |     | of the clinical relevance of chosen efficacy and harm        |             |
| 48 |                                                           |     | outcomes is strongly recommended                             |             |
| 49 |                                                           |     |                                                              |             |
| 50 |                                                           |     |                                                              |             |
| 51 | Participant                                               | 13  | Time schedule of enrolment, interventions (including any     | Figure 2, 3 |
| 52 | timeline                                                  |     | run-ins and washouts), assessments, and visits for           |             |
| 53 |                                                           |     | participants. A schematic diagram is highly recommended      |             |
| 54 |                                                           |     | (see Figure)                                                 |             |
| 55 |                                                           |     |                                                              |             |
| 56 |                                                           |     |                                                              |             |
| 57 |                                                           |     |                                                              |             |
| 58 |                                                           |     |                                                              |             |
| 59 |                                                           |     |                                                              |             |
| 60 |                                                           |     |                                                              |             |

|   |             |    |                                                                                                                                                                                       |
|---|-------------|----|---------------------------------------------------------------------------------------------------------------------------------------------------------------------------------------|
| 1 |             |    |                                                                                                                                                                                       |
| 2 | Sample size | 14 | Estimated number of participants needed to achieve study objectives and how it was determined, including clinical and statistical assumptions supporting any sample size calculations |
| 3 |             |    |                                                                                                                                                                                       |
| 4 |             |    |                                                                                                                                                                                       |
| 5 |             |    |                                                                                                                                                                                       |
| 6 |             |    |                                                                                                                                                                                       |
| 7 | Recruitment | 15 | Strategies for achieving adequate participant enrolment to reach target sample size                                                                                                   |
| 8 |             |    | 12, 14, 15                                                                                                                                                                            |
| 9 |             |    |                                                                                                                                                                                       |

### Methods: Assignment of interventions (for controlled trials)

#### Allocation:

|    |                                  |     |                                                                                                                                                                                                                                                                                                                                                          |                     |
|----|----------------------------------|-----|----------------------------------------------------------------------------------------------------------------------------------------------------------------------------------------------------------------------------------------------------------------------------------------------------------------------------------------------------------|---------------------|
| 14 | Sequence generation              | 16a | Method of generating the allocation sequence (eg, computer-generated random numbers), and list of any factors for stratification. To reduce predictability of a random sequence, details of any planned restriction (eg, blocking) should be provided in a separate document that is unavailable to those who enrol participants or assign interventions | 10 and supplement 3 |
| 15 |                                  |     |                                                                                                                                                                                                                                                                                                                                                          |                     |
| 16 |                                  |     |                                                                                                                                                                                                                                                                                                                                                          |                     |
| 17 |                                  |     |                                                                                                                                                                                                                                                                                                                                                          |                     |
| 18 |                                  |     |                                                                                                                                                                                                                                                                                                                                                          |                     |
| 19 |                                  |     |                                                                                                                                                                                                                                                                                                                                                          |                     |
| 20 |                                  |     |                                                                                                                                                                                                                                                                                                                                                          |                     |
| 21 |                                  |     |                                                                                                                                                                                                                                                                                                                                                          |                     |
| 22 |                                  |     |                                                                                                                                                                                                                                                                                                                                                          |                     |
| 23 |                                  |     |                                                                                                                                                                                                                                                                                                                                                          |                     |
| 24 | Allocation concealment mechanism | 16b | Mechanism of implementing the allocation sequence (eg, central telephone; sequentially numbered, opaque, sealed envelopes), describing any steps to conceal the sequence until interventions are assigned                                                                                                                                                | 10 and supplement 3 |
| 25 |                                  |     |                                                                                                                                                                                                                                                                                                                                                          |                     |
| 26 |                                  |     |                                                                                                                                                                                                                                                                                                                                                          |                     |
| 27 |                                  |     |                                                                                                                                                                                                                                                                                                                                                          |                     |
| 28 |                                  |     |                                                                                                                                                                                                                                                                                                                                                          |                     |
| 29 |                                  |     |                                                                                                                                                                                                                                                                                                                                                          |                     |
| 30 |                                  |     |                                                                                                                                                                                                                                                                                                                                                          |                     |
| 31 | Implementation                   | 16c | Who will generate the allocation sequence, who will enrol participants, and who will assign participants to interventions                                                                                                                                                                                                                                | 10 and supplement 3 |
| 32 |                                  |     |                                                                                                                                                                                                                                                                                                                                                          |                     |
| 33 |                                  |     |                                                                                                                                                                                                                                                                                                                                                          |                     |
| 34 |                                  |     |                                                                                                                                                                                                                                                                                                                                                          |                     |
| 35 | Blinding (masking)               | 17a | Who will be blinded after assignment to interventions (eg, trial participants, care providers, outcome assessors, data analysts), and how                                                                                                                                                                                                                | 7 and supplement 3  |
| 36 |                                  |     |                                                                                                                                                                                                                                                                                                                                                          |                     |
| 37 |                                  |     |                                                                                                                                                                                                                                                                                                                                                          |                     |
| 38 |                                  |     |                                                                                                                                                                                                                                                                                                                                                          |                     |
| 39 |                                  |     |                                                                                                                                                                                                                                                                                                                                                          |                     |
| 40 |                                  | 17b | If blinded, circumstances under which unblinding is permissible, and procedure for revealing a participant's allocated intervention during the trial                                                                                                                                                                                                     | 12                  |
| 41 |                                  |     |                                                                                                                                                                                                                                                                                                                                                          |                     |
| 42 |                                  |     |                                                                                                                                                                                                                                                                                                                                                          |                     |
| 43 |                                  |     |                                                                                                                                                                                                                                                                                                                                                          |                     |

### Methods: Data collection, management, and analysis

|    |                         |     |                                                                                                                                                                                                                                                                                                                                                                                                              |        |
|----|-------------------------|-----|--------------------------------------------------------------------------------------------------------------------------------------------------------------------------------------------------------------------------------------------------------------------------------------------------------------------------------------------------------------------------------------------------------------|--------|
| 46 | Data collection methods | 18a | Plans for assessment and collection of outcome, baseline, and other trial data, including any related processes to promote data quality (eg, duplicate measurements, training of assessors) and a description of study instruments (eg, questionnaires, laboratory tests) along with their reliability and validity, if known. Reference to where data collection forms can be found, if not in the protocol | 11, 12 |
| 47 |                         |     |                                                                                                                                                                                                                                                                                                                                                                                                              |        |
| 48 |                         |     |                                                                                                                                                                                                                                                                                                                                                                                                              |        |
| 49 |                         |     |                                                                                                                                                                                                                                                                                                                                                                                                              |        |
| 50 |                         |     |                                                                                                                                                                                                                                                                                                                                                                                                              |        |
| 51 |                         |     |                                                                                                                                                                                                                                                                                                                                                                                                              |        |
| 52 |                         |     |                                                                                                                                                                                                                                                                                                                                                                                                              |        |
| 53 |                         |     |                                                                                                                                                                                                                                                                                                                                                                                                              |        |
| 54 |                         |     |                                                                                                                                                                                                                                                                                                                                                                                                              |        |
| 55 |                         |     |                                                                                                                                                                                                                                                                                                                                                                                                              |        |
| 56 |                         |     |                                                                                                                                                                                                                                                                                                                                                                                                              |        |
| 57 |                         |     |                                                                                                                                                                                                                                                                                                                                                                                                              |        |
| 58 |                         |     |                                                                                                                                                                                                                                                                                                                                                                                                              |        |
| 59 |                         |     |                                                                                                                                                                                                                                                                                                                                                                                                              |        |
| 60 |                         |     |                                                                                                                                                                                                                                                                                                                                                                                                              |        |

|    |                                 |     |                                                                |
|----|---------------------------------|-----|----------------------------------------------------------------|
| 1  |                                 |     |                                                                |
| 2  |                                 | 18b | Plans to promote participant retention and complete            |
| 3  |                                 |     | follow-up, including list of any outcome data to be            |
| 4  |                                 |     | collected for participants who discontinue or deviate from     |
| 5  |                                 |     | intervention protocols                                         |
| 6  |                                 |     |                                                                |
| 7  | Data                            | 19  | Plans for data entry, coding, security, and storage,           |
| 8  | management                      |     | including any related processes to promote data quality        |
| 9  |                                 |     | (eg, double data entry; range checks for data values).         |
| 10 |                                 |     | Reference to where details of data management                  |
| 11 |                                 |     | procedures can be found, if not in the protocol                |
| 12 |                                 |     |                                                                |
| 13 |                                 |     |                                                                |
| 14 | Statistical                     | 20a | Statistical methods for analysing primary and secondary        |
| 15 | methods                         |     | outcomes. Reference to where other details of the              |
| 16 |                                 |     | statistical analysis plan can be found, if not in the protocol |
| 17 |                                 |     |                                                                |
| 18 |                                 |     |                                                                |
| 19 |                                 | 20b | Methods for any additional analyses (eg, subgroup and          |
| 20 |                                 |     | adjusted analyses)                                             |
| 21 |                                 |     |                                                                |
| 22 |                                 | 20c | Definition of analysis population relating to protocol non-    |
| 23 |                                 |     | adherence (eg, as randomised analysis), and any                |
| 24 |                                 |     | statistical methods to handle missing data (eg, multiple       |
| 25 |                                 |     | imputation)                                                    |
| 26 |                                 |     |                                                                |
| 27 |                                 |     |                                                                |
| 28 | <b>Methods: Monitoring</b>      |     |                                                                |
| 29 |                                 |     |                                                                |
| 30 | Data                            | 21a | Composition of data monitoring committee (DMC);                |
| 31 | monitoring                      |     | summary of its role and reporting structure; statement of      |
| 32 |                                 |     | whether it is independent from the sponsor and competing       |
| 33 |                                 |     | interests; and reference to where further details about its    |
| 34 |                                 |     | charter can be found, if not in the protocol. Alternatively,   |
| 35 |                                 |     | an explanation of why a DMC is not needed                      |
| 36 |                                 |     |                                                                |
| 37 |                                 |     |                                                                |
| 38 |                                 | 21b | Description of any interim analyses and stopping               |
| 39 |                                 |     | guidelines, including who will have access to these interim    |
| 40 |                                 |     | results and make the final decision to terminate the trial     |
| 41 |                                 |     |                                                                |
| 42 | Harms                           | 22  | Plans for collecting, assessing, reporting, and managing       |
| 43 |                                 |     | solicited and spontaneously reported adverse events and        |
| 44 |                                 |     | other unintended effects of trial interventions or trial       |
| 45 |                                 |     | conduct                                                        |
| 46 |                                 |     |                                                                |
| 47 |                                 |     |                                                                |
| 48 | Auditing                        | 23  | Frequency and procedures for auditing trial conduct, if        |
| 49 |                                 |     | any, and whether the process will be independent from          |
| 50 |                                 |     | investigators and the sponsor                                  |
| 51 |                                 |     |                                                                |
| 52 |                                 |     |                                                                |
| 53 | <b>Ethics and dissemination</b> |     |                                                                |
| 54 |                                 |     |                                                                |
| 55 | Research                        | 24  | Plans for seeking research ethics committee/institutional      |
| 56 | ethics                          |     | review board (REC/IRB) approval                                |
| 57 | approval                        |     |                                                                |
| 58 |                                 |     |                                                                |
| 59 |                                 |     |                                                                |
| 60 |                                 |     |                                                                |

|    |                               |     |                                                                                                                                                                                                                                                                                     |                    |
|----|-------------------------------|-----|-------------------------------------------------------------------------------------------------------------------------------------------------------------------------------------------------------------------------------------------------------------------------------------|--------------------|
| 1  |                               |     |                                                                                                                                                                                                                                                                                     |                    |
| 2  | Protocol amendments           | 25  | Plans for communicating important protocol modifications (eg, changes to eligibility criteria, outcomes, analyses) to relevant parties (eg, investigators, REC/IRBs, trial participants, trial registries, journals, regulators)                                                    | N/A                |
| 3  |                               |     |                                                                                                                                                                                                                                                                                     |                    |
| 4  |                               |     |                                                                                                                                                                                                                                                                                     |                    |
| 5  |                               |     |                                                                                                                                                                                                                                                                                     |                    |
| 6  |                               |     |                                                                                                                                                                                                                                                                                     |                    |
| 7  | Consent or assent             | 26a | Who will obtain informed consent or assent from potential trial participants or authorised surrogates, and how (see Item 32)                                                                                                                                                        | 14, 15             |
| 8  |                               |     |                                                                                                                                                                                                                                                                                     |                    |
| 9  |                               |     |                                                                                                                                                                                                                                                                                     |                    |
| 10 |                               |     |                                                                                                                                                                                                                                                                                     |                    |
| 11 |                               |     |                                                                                                                                                                                                                                                                                     |                    |
| 12 |                               | 26b | Additional consent provisions for collection and use of participant data and biological specimens in ancillary studies, if applicable                                                                                                                                               | N/A                |
| 13 |                               |     |                                                                                                                                                                                                                                                                                     |                    |
| 14 |                               |     |                                                                                                                                                                                                                                                                                     |                    |
| 15 |                               |     |                                                                                                                                                                                                                                                                                     |                    |
| 16 | Confidentiality               | 27  | How personal information about potential and enrolled participants will be collected, shared, and maintained in order to protect confidentiality before, during, and after the trial                                                                                                | 11                 |
| 17 |                               |     |                                                                                                                                                                                                                                                                                     |                    |
| 18 |                               |     |                                                                                                                                                                                                                                                                                     |                    |
| 19 |                               |     |                                                                                                                                                                                                                                                                                     |                    |
| 20 |                               |     |                                                                                                                                                                                                                                                                                     |                    |
| 21 |                               |     |                                                                                                                                                                                                                                                                                     |                    |
| 22 | Declaration of interests      | 28  | Financial and other competing interests for principal investigators for the overall trial and each study site                                                                                                                                                                       | Title page         |
| 23 |                               |     |                                                                                                                                                                                                                                                                                     |                    |
| 24 |                               |     |                                                                                                                                                                                                                                                                                     |                    |
| 25 | Access to data                | 29  | Statement of who will have access to the final trial dataset, and disclosure of contractual agreements that limit such access for investigators                                                                                                                                     | 11,12              |
| 26 |                               |     |                                                                                                                                                                                                                                                                                     |                    |
| 27 |                               |     |                                                                                                                                                                                                                                                                                     |                    |
| 28 |                               |     |                                                                                                                                                                                                                                                                                     |                    |
| 29 |                               |     |                                                                                                                                                                                                                                                                                     |                    |
| 30 | Ancillary and post-trial care | 30  | Provisions, if any, for ancillary and post-trial care, and for compensation to those who suffer harm from trial participation                                                                                                                                                       | 14                 |
| 31 |                               |     |                                                                                                                                                                                                                                                                                     |                    |
| 32 |                               |     |                                                                                                                                                                                                                                                                                     |                    |
| 33 |                               |     |                                                                                                                                                                                                                                                                                     |                    |
| 34 | Dissemination policy          | 31a | Plans for investigators and sponsor to communicate trial results to participants, healthcare professionals, the public, and other relevant groups (eg, via publication, reporting in results databases, or other data sharing arrangements), including any publication restrictions | Via Publication    |
| 35 |                               |     |                                                                                                                                                                                                                                                                                     |                    |
| 36 |                               |     |                                                                                                                                                                                                                                                                                     |                    |
| 37 |                               |     |                                                                                                                                                                                                                                                                                     |                    |
| 38 |                               |     |                                                                                                                                                                                                                                                                                     |                    |
| 39 |                               |     |                                                                                                                                                                                                                                                                                     |                    |
| 40 |                               |     |                                                                                                                                                                                                                                                                                     |                    |
| 41 |                               | 31b | Authorship eligibility guidelines and any intended use of professional writers                                                                                                                                                                                                      | ICMJE              |
| 42 |                               |     |                                                                                                                                                                                                                                                                                     |                    |
| 43 |                               |     |                                                                                                                                                                                                                                                                                     |                    |
| 44 |                               | 31c | Plans, if any, for granting public access to the full protocol, participant-level dataset, and statistical code                                                                                                                                                                     | N/A                |
| 45 |                               |     |                                                                                                                                                                                                                                                                                     |                    |
| 46 |                               |     |                                                                                                                                                                                                                                                                                     |                    |
| 47 |                               |     |                                                                                                                                                                                                                                                                                     |                    |
| 48 | <b>Appendices</b>             |     |                                                                                                                                                                                                                                                                                     |                    |
| 49 |                               |     |                                                                                                                                                                                                                                                                                     |                    |
| 50 | Informed consent materials    | 32  | Model consent form and other related documentation given to participants and authorised surrogates                                                                                                                                                                                  | Available in Farsi |
| 51 |                               |     |                                                                                                                                                                                                                                                                                     |                    |
| 52 |                               |     |                                                                                                                                                                                                                                                                                     |                    |
| 53 |                               |     |                                                                                                                                                                                                                                                                                     |                    |
| 54 | Biological specimens          | 33  | Plans for collection, laboratory evaluation, and storage of biological specimens for genetic or molecular analysis in the current trial and for future use in ancillary studies, if applicable                                                                                      | N/A                |
| 55 |                               |     |                                                                                                                                                                                                                                                                                     |                    |
| 56 |                               |     |                                                                                                                                                                                                                                                                                     |                    |
| 57 |                               |     |                                                                                                                                                                                                                                                                                     |                    |
| 58 |                               |     |                                                                                                                                                                                                                                                                                     |                    |
| 59 |                               |     |                                                                                                                                                                                                                                                                                     |                    |
| 60 |                               |     |                                                                                                                                                                                                                                                                                     |                    |

1 \*It is strongly recommended that this checklist be read in conjunction with the SPIRIT 2013  
2 Explanation & Elaboration for important clarification on the items. Amendments to the  
3 protocol should be tracked and dated. The SPIRIT checklist is copyrighted by the SPIRIT  
4 Group under the Creative Commons "[Attribution-NonCommercial-NoDerivs 3.0 Unported](#)"  
5 license.  
6  
7  
8  
9  
10  
11  
12  
13  
14  
15  
16  
17  
18  
19  
20  
21  
22  
23  
24  
25  
26  
27  
28  
29  
30  
31  
32  
33  
34  
35  
36  
37  
38  
39  
40  
41  
42  
43  
44  
45  
46  
47  
48  
49  
50  
51  
52  
53  
54  
55  
56  
57  
58  
59  
60

For peer review only
